# Supplementary material for: Steroid hormones regulate genome-wide epigenetic programming and gene transcription in human endometrial cells with marked aberrancies in endometriosis
Source: PLoS Genet. 2020 Jun 17;16(6):e1008601. doi: 10.1371/journal.pgen.1008601 (PMC7299312; doi:10.1371/journal.pgen.1008601)
Supplement: S5 Table — (XLSX) [file pgen.1008601.s008.xlsx]

## Sheet: pathways
Supp table 5. Enriched pathways and the associated genes and upstream regulators of differentially expressed gene in response to hormones (E2, P4, E2+P4) vs vehicle, in normal (NUP), stage I (Endo I), and stage IV (Endo IV) disease.
5a. Enriched pathways and genes.
	Categories	Functions	Diseases or Functions Annotation	p-Value	Activation State	z-score	Genes	# Molecules
NUP_E2 vs Veh	Tissue Development	development	development of endothelial tissue	9.22e-07	Increased	2.155	SULF1,FLT1,ANGPT1,BMP2,PTN,SEMA6A,mir-503,NR4A2,RHOB,CCL2,RGS5,THBS1,SERPINE1,CD34,RCAN2	15
	Cellular Development, function, maintenance and growth and Proliferation, Organismal and tissue Development	development	endothelial cell development	4.04e-06	Increased	2.155	SULF1,FLT1,ANGPT1,BMP2,PTN,SEMA6A,mir-503,NR4A2,CCL2,RGS5,THBS1,SERPINE1,CD34,RCAN2	14
	Cellular Development, Cellular Growth and Proliferation	cell proliferation	cell proliferation of sarcoma cell lines	8.26e-06	Decreased	-2.425	KITLG,CTGF,CDH4,EMILIN2,RHOB,FLT1,IL6	7
	Cell-To-Cell Signaling and Interaction, Hematological System Development and Function, Immune Cell Trafficking	adhesion	adhesion of immune cells	2.65e-05	Decreased	-2.101	KITLG,FLT1,ENTPD1,CCL2,THBS1,IL6,PLTP,SERPINE1,IL7,CADM1	10
	Cell Death and Survival, Organismal Injury and Abnormalities	cell death	cell death of endothelial cells	3.8e-05	Decreased	-2.011	RHOB,ARHGAP18,RGS5,THBS1,SEMA6A,CASP1,SERPINE1,KLF4	8
	Inflammatory Response	inflammatory response	inflammatory response	9.82e-05	Decreased	-2.385	KITLG,LCP1,TNFSF4,FLT1,CCL2,THBS1,PXK,TGFB2,MYLK,IL6,SERPINE1,KLF4,AFAP1L2	13
	Cell Death and Survival, Skeletal and Muscular Disorders	apoptosis	apoptosis of muscle cells	0.000191	Decreased	-2.182	NRG1,IGF1,BMP2,PTN,CASP1	5
	Lipid Metabolism, Small Molecule Biochemistry	synthesis	synthesis of lipid	0.000417	Decreased	-2.073	IGFBP4,FLT1,BMP2,ETV1,IL6,GPAT4,SPTSSA,KITLG,NPC1,ACER3,IGF1,SPTLC2,ACSL1	13
	Cellular Movement, Immune Cell Trafficking	migration	leukocyte migration	0.00213	Decreased	-2.596	TNFSF18,KITLG,LCP1,FLT1,CCL2,THBS1,TGFB2,MYLK,IL6,SERPINE1,IL7	11
NUP_P4 vs Veh	Cellular Growth and Proliferation, Tissue Development	generation	generation of cells	2.18e-05	Decreased	-2.168	SULF1,TNFSF4,ADAMTS1,NLGN1,BDNF,SMAD3,PTN,CXCL12,MFGE8,IL6,CCL2,RGS5,IGF1,TGFB2,DKK1,ROBO2,SFRP1,SERPINE1,ZBTB16,CD34	20
	Cardiovascular System Development and Function, Cell-To-Cell Signaling and Interaction	adhesion	adhesion of vascular endothelial cells	0.000518	Decreased	-2.236	TNFSF4,CCL2,NLGN1,ITGA6,CXCL12	5
NUP_E2+P4 vs Veh	Organismal Survival	survival	survival of organism	4.4e-07	Increased	2.236	TYMS,TCF4,ARRDC4,EPAS1,RECK,CXCL12,IL6,IL1R1,SLC29A1,CCND1,CADM1,PGR,FUT8,SOD2,FOXO1,CCL2,ETS2,LIMA1,GSTM4,LAMA3,GLUL,SERPINE1,ESR1	23
	Cell Death and Survival, Organismal Injury and Abnormalities, Renal and Urological Disease	cell death	cell death of kidney cell lines	1.02e-05	Increased	2.072	CRYAB,TCF4,IL17RD,EMP2,BNIP3,MAP3K5,SGPL1,IGF1,CASP1,IGF1R,PLCB1,GNA13,EMP3,RGS4,PAWR,ITPR1,F3,PSIP1,KCNB1,PMP22,FOXO1,IRS1,IGFBP3,SNCA,TNFRSF19	25
	Cell Death and Survival, Organismal Injury and Abnormalities	cell death	cell death of epithelial cell lines	2.86e-05	Increased	2.091	TCF4,CRYAB,IL17RD,EMP3,EMP2,BNIP3,RGS4,PAWR,MAP3K5,PSIP1,SGPL1,KCNB1,PMP22,FOXO1,IGF1,IRS1,IGFBP3,IGF1R,CASP1,PLCB1,SFRP1,TNFRSF19,SNCA	23
	Cell Death and Survival, Embryonic Development	cell death	cell death of embryonic cell lines	0.00012	Increased	2.163	TCF4,CRYAB,IL17RD,EMP3,EMP2,BNIP3,RGS4,MAP3K5,PSIP1,SGPL1,KCNB1,PMP22,FOXO1,IGF1,IRS1,IGF1R,CASP1,IGFBP3,PLCB1,TNFRSF19,SNCA	21
	Carbohydrate Metabolism, Molecular Transport	transport	transport of carbohydrate	0.00047	Increased	2.341	NPC1,ENPP1,SLC2A1,IGF1,SORBS1,PIK3R1,IRS1,IRS2,INSR	9
	Cellular Growth and Proliferation	proliferation	proliferation of eye cell lines	0.00113	Decreased	-2	SMAD3,PTN,TGFB2,CCND1	4
	Carbohydrate Metabolism	quantity	quantity of carbohydrate	0.00202	Decreased	-2.219	BDKRB2,FUT8,IGF1,PLPP3,FIG4,INSR,SDC4,PIP4K2A,ACSL1	9
Endo I_E2 vs Veh	Cell Death & Survival, Nervous System Development & Function	cell viability	cell viability of neurons	2.38e-05	Increased	2	NRG1,IGF1,BMP2,SNCA	4
	Cellular Growth and Proliferation, Tissue Development	generation	generation of cells	0.000136	Increased	2.096	NRG1,TNFSF4,FLT1,RGS5,CCL2,IGF1,BMP2,SEMA6A,SERPINE1,KLF4,CD34,mir-503	12
Endo I_ P4 vs Veh	No biofunctions and upstream >2, very small # of DE
Endo I_E2+P4 vs Veh	Carbohydrate Metabolism, Molecular Transport	transport	transport of carbohydrate	9.75e-06	Increased	2.138	NPC1,ENPP1,IGF1,SORBS1,PIK3R1,IRS1,IRS2,INSR	8
	Organismal Survival	survival	survival of organism	1.67e-05	Increased	2.236	TYMS,MME,ARRDC4,SOD2,CCL2,FOXO1,ETS2,LAMA3,GLUL,IL6,IL1R1,SLC29A1,PGR	13
	Cell Death and Survival	cell viability	cell viability	6.92e-05	Increased	2.483	DPP4,MGST1,CXCR4,ITGB1BP1,PTN,PPP1CB,IL6,PGR,NRG1,TLR4,NFIL3,IGF1,FOXO1,ETS2,ANTXR2,SLC40A1,INSR,SFRP1,SNCA,APOD	20
	Cancer, Organismal Injury and Abnormalities	invasion	invasion of epithelial tissue	0.000555	Increased	2	MITF,RGS4,THBD,CD151	4
	Cell Death and Survival	cell death	cell death of immune cells	0.00414	Increased	2.223	TLR4,NFIL3,SOD2,FOXO1,IGF1,ETS2,CXCR4,IL6,ITPR1,ZBTB16	10
Endo IV_E2 vs Veh	Tissue Development	growth	growth of epithelial tissue	5.97e-08	Increased	2.948	FLT1,BMP2,PTN,SEMA6A,CXCL12,RGS4,IL6,mir-503,IGF1,RGS5,MGP,LAMA3,TGFB2,DKK1,SERPINE1	15
	Cellular Growth and Proliferation, Tissue Development	generation	generation of cells	3.16e-07	Increased	2.335	TNFSF4,FLT1,BMP2,SEMA6A,PTN,CXCL12,IL6,KLF4,mir-503,NRG1,CCL2,RGS5,IGF1,TGFB2,MGP,LAMA3,DKK1,SERPINE1	18
	Tissue Development	development	development of epithelial tissue	2.21e-06	Increased	2.63	FLT1,RGS5,CCL2,BMP2,SEMA6A,PTN,CXCL12,MGP,DKK1,SERPINE1,KLF4,mir-503	12
	Cardiovascular System Developmen/Function, Cellular Development, Function, Maintenance, Growth and Proliferation, Organismal Development, Tissue Development	development	endothelial cell development	4.71e-06	Increased	2.63	FLT1,RGS5,CCL2,BMP2,SEMA6A,PTN,CXCL12,MGP,DKK1,SERPINE1,mir-503	11
	Infectious Diseases	replication	replication of virus	7.44e-06	Decreased	-2.027	CCL2,MX1,BMP2,TGFB2,CXCL12,IL6,DKK1,IFITM1	8
	Cell-To-Cell Signaling and Interaction	adhesion	adhesion of tumor cell lines	3.49e-05	Increased	2.17	NRG1,IGF1,CXCL12,LAMA3,SERPINE1	5
	Cardiovascular System Development/Function, Cellular development, function, maintenance, growth and proliferation, Organismal Development, Tissue Development	cell proliferation	cell proliferation of vascular endothelial cells	6.72e-05	Increased	2.219	FLT1,RGS5,SEMA6A,PTN,CXCL12,DKK1	6
Endo IV_P4 vs Veh	Cellular Growth and Proliferation	proliferation	proliferation of cells	0.0278	Increased	1.903	TLR4,IGF1,MGP,IL1R1	4
Endo IV_E2+P4 vs Veh	Organismal Survival	survival	survival of organism	7.69e-07	Increased	2.236	MME,TYMS,TCF4,ARRDC4,CTGF,IL6,IL1R1,CCND1,SLC29A1,PLD1,PGR,VEGFA,SOD2,CCL2,FOXO1,ETS2,LIMA1,LAMA3,GLUL,HMGA2	20
	Cellular Movement	invasion	invasion of breast cell lines	0.00158	Increased	2.19	SULF1,CXCR4,TGFBR3,DUSP6,TWIST1,PTGER2	6
	Cell-To-Cell Signaling and Interaction	adhesion	adhesion of tumor cell lines	2.66e-08	Increased	2.074	NRG1,TIMP3,ITGA3,IGF1,JAM3,MGAT5,CTSB,LAMA3,EFEMP1,NID1,CD151,ETV5	12
	Cellular Development, Cellular Growth and Proliferation	cell proliferation	cell proliferation of sarcoma cell lines	1.3e-07	Decreased	-2.074	VEGFA,TIMP3,KCNH1,CTGF,EMILIN2,RHOB,SDC2,MYOCD,PDGFRA,IGF1R,IL6,CCND1,HMGA2	13
	Cellular Development, Cellular Growth and Proliferation	proliferation	proliferation of rhabdomyosarcoma cell lines	0.000611	Decreased	-2.172	VEGFA,KCNH1,CTGF,PDGFRA,CCND1,HMGA2	6

## Sheet: Upstream regulators
5b. Upstream regulators.
	Upstream Regulator	Molecule Type	z-score	Activation State	Target molecules in the study
NUP_E2 vs Veh	TREM1	transmembrane receptor	2.236	Activated	HOMER1,IL6,NPC1,NR4A2,PLD1,THBS1
	E2F3	transcription regulator	-2.219	Inhibited	FAM102A,FAM46A,LAMA4,PTN,THBS1
NUP_P4 vs Veh	TREM1	transmembrane receptor	2	Activated	ARRDC4,HOMER1,IL6,LPL,THBD
NUP_E2+P4 vs Veh	TREM1	transmembrane receptor	2.828	Activated	ARRDC4,BRE,CD83,CXCR4,ETS2,F3,FABP3,FERMT2,GREM1,HOMER1,IFIT2,IL6,LPL,MMP19,NPC1,PLPP3,RHOU,SFMBT2,THBD
	TP73	transcription regulator	2.111	Activated	ARNTL,CADM1,CCL2,CRYAB,GAB2,IGFBP4,PLK2,PMP22,SAT1,SERPINE1,SNRK
	INS	other	-2.183	Inhibited	CRABP2,IGFBP1,IL6,LPL,PLIN2
Endo I_E2 vs Veh	no upstream regulator
Endo I_ P4 vs Veh	no upstream regulator
Endo I_E2+P4 vs Veh	TREM1	transmembrane receptor	2.121	Activated	ARRDC4,CXCR4,EDN1,ETS2,HOMER1,IL6,NPC1,PLPP3,THBD
Endo IV_E2 vs Veh	no upstream regulator w Z>2
Endo IV_P4vs Veh	no upstream regulator
Endo IV_E2+P4 vs Veh	EFNA2	kinase	2.646	Activated	CTGF,DUSP6,ETV5,KRT18,NFIL3,SLC20A1,UBE2C
	EFNA5	kinase	2.449	Activated	CTGF,DUSP6,ETV5,KRT18,SLC20A1,UBE2C
	EFNA3	kinase	2.449	Activated	CTGF,DUSP6,ETV5,KRT18,SLC20A1,UBE2C
	EFNA4	kinase	2.449	Activated	CTGF,DUSP6,ETV5,KRT18,SLC20A1,UBE2C
	EFNA1	other	2.449	Activated	CTGF,DUSP6,ETV5,KRT18,SLC20A1,UBE2C
	CYR61	other	-2	Inhibited	CCND1,FZD7,SFRP1,VEGFA
	P38 MAPK	group	-2.17	Inhibited	CCL2,CTGF,FST,IL6,LAMA3,RBP1,VEGFA
	INS	other	-2.195	Inhibited	IGFBP1,IL6,LPL,PLIN2,VEGFA
	TLR7	transmembrane receptor	-2.388	Inhibited	CCL2,CPA4,IER3,IL1R1,IL6,KCNH1
