# Supplementary material for: Steroid hormones regulate genome-wide epigenetic programming and gene transcription in human endometrial cells with marked aberrancies in endometriosis
Source: PLoS Genet. 2020 Jun 17;16(6):e1008601. doi: 10.1371/journal.pgen.1008601 (PMC7299312; doi:10.1371/journal.pgen.1008601)
Supplement: S13 Table — (XLSX) [file pgen.1008601.s016.xlsx]

## Sheet: E2_neg rho_Gain
Supp Table 13. Association of differentially methylated (DM) loci with differentially expressed (DE) genes in stage IV eSF (Endo IV) for all hormone treatments (E2, P4, E2+P4) vs. vehicle, based on positive or negative association (positive/negative rho) and gain and loss of methylation (gain/loss). Only loci with strong rho and corrected p<0.05 are included.
Supp Table 13a. Loci with strong NEGATIVE association (by rho) in changes in DNA methylation (in GAIN of methylation) with changes in gene expression in stage IV (Endo IV) in E2 vs vehicle.
HM450K.ID	Affy_ID	Symbol	CHR	UCSC_RefGene_Name	UCSC_RefGene_Accession	UCSC_CpG_Islands_Name	Regulatory_Feature_Name	Regulatory_Feature_Group	Affy_Refseq	Affy_Symbol.1	Affy_Entrez	Affy_Ensembl	Rho	P val
cg00091960	8142721	GRM8	7	GRM8;GRM8;GRM8	NM_001127323;NR_028041;NM_000845				NM_001127323	GRM8	2918	SG0000017960	-0.904762	0.00456349
cg00361380	7989429	VPS13C	15	VPS13C;VPS13C	NM_017684;NM_020821				NM_020821	VPS13C	54832	SG0000012900	-0.809524	0.0217758
cg00361380	7989430	VPS13C	15	VPS13C;VPS13C	NM_017684;NM_020821				NM_020821	VPS13C	54832	SG0000012900	-0.761905	0.036756
cg00361380	7989457	VPS13C	15	VPS13C;VPS13C	NM_017684;NM_020821				NM_020821	VPS13C	54832	SG0000012900	-0.738095	0.0458333
cg00361380	7989469	VPS13C	15	VPS13C;VPS13C	NM_017684;NM_020821				NM_020821	VPS13C	54832	SG0000012900	-0.857143	0.0107143
cg01039849	8107312	CAMK4	5	CAMK4	NM_001744				NM_001744	CAMK4	814	SG0000015249	-0.785714	0.0279266
cg01232748	8100386	CHIC2	4	CHIC2	NM_012110	chr4:54930241-54931079			NM_012110	CHIC2	26511	SG0000010922	-0.833333	0.015377
cg01379412	7943809	DIXDC1	11	DIXDC1	NM_001037954	chr11:111807607-111808203			NM_001037954	DIXDC1	85458	SG0000015076	-0.809524	0.0217758
cg01379412	7943826	DIXDC1	11	DIXDC1	NM_001037954	chr11:111807607-111808203			NM_001037954	DIXDC1	85458	SG0000015076	-0.785714	0.0279266
cg03518202	7915687	ZSWIM5	1	ZSWIM5	NM_020883	chr1:45671702-45672388			NM_020883	ZSWIM5	57643	SG0000016241	-0.738095	0.0458333
cg03629497	8152388	CSMD3	8	CSMD3;CSMD3	NM_052900;NM_198123	chr8:114444826-114445085			NM_052900	CSMD3	114788	SG0000016479	-0.833333	0.015377
cg03629497	8152395	CSMD3	8	CSMD3;CSMD3	NM_052900;NM_198123	chr8:114444826-114445085			NM_198123	CSMD3	114788	SG0000016479	-0.857143	0.0107143
cg03629497	8152401	CSMD3	8	CSMD3;CSMD3	NM_052900;NM_198123	chr8:114444826-114445085			NM_198123	CSMD3	114788	SG0000016479	-0.857143	0.0107143
cg03629497	8152405	CSMD3	8	CSMD3;CSMD3	NM_052900;NM_198123	chr8:114444826-114445085			NM_198123	CSMD3	114788	SG0000016479	-0.761905	0.036756
cg03629497	8152407	CSMD3	8	CSMD3;CSMD3	NM_052900;NM_198123	chr8:114444826-114445085			NM_052900	CSMD3	114788	SG0000016479	-0.738095	0.0458333
cg03629497	8152435	CSMD3	8	CSMD3;CSMD3	NM_052900;NM_198123	chr8:114444826-114445085			NM_052900	CSMD3	114788	SG0000016479	-0.761905	0.036756
cg03629497	8152439	CSMD3	8	CSMD3;CSMD3	NM_052900;NM_198123	chr8:114444826-114445085			NM_052900	CSMD3	114788	SG0000016479	-0.904762	0.00456349
cg03796122	7970852	KATNAL1	13	KATNAL1;KATNAL1	NM_001014380;NM_032116				NM_001014380	KATNAL1	84056	SG0000010278	-0.738095	0.0458333
cg04235548	8107507	DMXL1	5	DMXL1	NM_005509				NM_005509	DMXL1	1657	SG0000017286	-0.809524	0.0217758
cg04678086	8105203	PARP8	5	PARP8	NM_024615	chr5:49962267-49963777			NM_024615	PARP8	79668	SG0000015188	-0.738095	0.0458333
cg04678086	8105206	PARP8	5	PARP8	NM_024615	chr5:49962267-49963777			NM_024615	PARP8	79668	SG0000015188	-0.761905	0.036756
cg04770195	7995613	CHD9	16	CHD9	NM_025134				NM_025134	CHD9	80205	SG0000017720	-0.738095	0.0458333
cg04770195	7995618	CHD9	16	CHD9	NM_025134				NM_025134	CHD9	80205	SG0000017720	-0.904762	0.00456349
cg04844516	8111227	CDH18	5	CDH18;CDH18	NM_001167667;NM_004934				NM_001167667	CDH18	1016	SG0000014552	-0.761905	0.036756
cg05357137	7932775	MPP7	10	MPP7	NM_173496				NM_173496	MPP7	143098	SG0000015005	-0.738095	0.0458333
cg05358758	7963445	KRT71	12	KRT71	NM_033448				NM_033448	KRT71	112802	SG0000013964	-0.785714	0.0279266
cg06042574	8171929	DMD	X	DMD;DMD	NM_000109;NM_004006				NM_004006	DMD	1756	SG0000019894	-0.833333	0.015377
cg06042574	8171932	DMD	X	DMD;DMD	NM_000109;NM_004006				NM_004006	DMD	1756	SG0000019894	-0.785714	0.0279266
cg06423925	7930301	MEIR5	10	C10orf78;C10orf78	NM_001002759;NM_145247	chr10:105881449-105881947			NM_145247	MEIR5	119392	SG0000015638	-0.809524	0.0217758
cg07035001	8137018	CNTNAP2	7	CNTNAP2	NM_014141				NM_014141	CNTNAP2	26047	SG0000017446	-0.809524	0.0217758
cg07565710	8037451	ZNF235	19	ZNF235	NM_004234	chr19:44808897-44809229			NM_004234	ZNF235	9310	SG0000015991	-0.833333	0.015377
cg07969095	8045599	ACVR2A	2	ACVR2A	NM_001616	chr2:148601280-148602859			NM_001616	ACVR2A	92	SG0000012198	-0.738095	0.0458333
cg08244656	7933226	OR13A1	10	OR13A1	NM_001004297				NM_001004297	OR13A1	79290	SG0000017267	-0.738095	0.0458333
cg08787988	8051173	IFT172	2	IFT172	NM_015662	chr2:27712554-27712842	2:27712053-27713179	Promoter_Associated	NM_015662	IFT172	26160	SG0000013800	-0.880952	0.00724206
cg08827001	7943743	C11orf88	11	BTG4;C11orf88;C11orf88;MIR34C	NM_017589;NM_001100388;NM_207430;NR_029840	chr11:111385337-111385712			NM_207430	C11orf88	399949	SG0000018364	-0.761905	0.036756
cg10500570	8147645	VPS13B	8	MIR599;VPS13B;VPS13B;MIR875	NR_030329;NM_017890;NM_152564;NR_030596				NM_152564	VPS13B	157680	SG0000013254	-0.904762	0.00456349
cg10598596	8038729	KLK10	19	KLK10;KLK10;KLK10	NM_002776;NM_001077500;NM_145888	chr19:51520153-51520907			NM_145888	KLK10	5655	SG0000012945	-0.880952	0.00724206
cg11909989	8148338	EFR3A	8	EFR3A	NM_015137				NM_015137	EFR3A	23167	SG0000013229	-0.761905	0.036756
cg12028740	8149006	CSMD1	8	CSMD1	NM_033225				NM_033225	CSMD1	64478	SG0000018311	-0.785714	0.0279266
cg12028740	8149027	CSMD1	8	CSMD1	NM_033225				NM_033225	CSMD1	64478	SG0000018311	-0.785714	0.0279266
cg12028740	8149054	CSMD1	8	CSMD1	NM_033225				NM_033225	CSMD1	64478	SG0000018311	-0.761905	0.036756
cg12028740	8149057	CSMD1	8	CSMD1	NM_033225				NM_033225	CSMD1	64478	SG0000018311	-0.880952	0.00724206
cg12028740	8149063	CSMD1	8	CSMD1	NM_033225				NM_033225	CSMD1	64478	SG0000018311	-0.809524	0.0217758
cg12408998	7952625	KCNJ1	11	KCNJ1;KCNJ1;KCNJ1;KCNJ1	NM_153766;NM_153764;NM_153765;NM_153767		11:128737163-128737479	Unclassified_Cell_type_specific	NM_153767	KCNJ1	3758	SG0000015170	-0.833333	0.015377
cg13235098	8097166	KIAA1109	4	KIAA1109	NM_015312				NM_015312	KIAA1109	84162	SG0000013868	-0.738095	0.0458333
cg13280741	8112254	PDE4D	5	PDE4D;PDE4D;PDE4D	NM_001165899;NM_001104631;NM_006203				NM_006203	PDE4D	5144	SG0000011344	-0.857143	0.0107143
cg13445249	8020758	DSG4	18	DSG4;DSG4	NM_001134453;NM_177986				NM_177986	DSG4	147409	SG0000017506	-0.761905	0.036756
cg13753868	8024528	ZNF556	19	ZNF556	NM_024967				NM_024967	ZNF556	80032	SG0000017200	-0.738095	0.0458333
cg13930665	8160069	PTPRD	9	PTPRD;PTPRD	NM_002839;NM_130391				NM_130391	PTPRD	5789	SG0000015370	-0.928571	0.00223214
cg14958956	7929880	FAM178A	10	FAM178A	NM_018121				NM_018121	FAM178A	55719	SG0000011990	-0.785714	0.0279266
cg15762399	7969552	NDFIP2	13	NDFIP2;NDFIP2	NM_001161407;NM_019080				NM_019080	NDFIP2	54602	SG0000010247	-0.833333	0.015377
cg15943335	8152429	CSMD3	8	CSMD3;CSMD3;CSMD3;MIR2053	NM_198124;NM_052900;NM_198123;NR_031745				NM_198123	CSMD3	114788	SG0000016479	-0.833333	0.015377
cg15943335	8152433	CSMD3	8	CSMD3;CSMD3;CSMD3;MIR2053	NM_198124;NM_052900;NM_198123;NR_031745				NM_198123	CSMD3	114788	SG0000016479	-0.761905	0.036756
cg16740746	7997360	WWOX	16	WWOX;WWOX	NM_016373;NM_130791	chr16:78133174-78134066	16:78132751-78134701	Promoter_Associated	NM_130791	WWOX	51741	SG0000018615	-0.833333	0.015377
cg17384076	8124845	FLOT1	6	FLOT1	NM_005803	chr6:30710307-30712440			NM_005803	FLOT1	10211	ENSG00000137312, ENSG00000206379, ENSG00000206480, ENSG00000230143, ENSG00000232280	-0.809524	0.0217758
cg17384076	8178434	FLOT1	6	FLOT1	NM_005803	chr6:30710307-30712440			NM_005803	FLOT1	10211	ENSG00000137312, ENSG00000206379, ENSG00000206480, ENSG00000230143, ENSG00000232280	-0.809524	0.0217758
cg17384076	8179703	FLOT1	6	FLOT1	NM_005803	chr6:30710307-30712440			NM_005803	FLOT1	10211	ENSG00000137312, ENSG00000206379, ENSG00000206480, ENSG00000230143, ENSG00000232280	-0.809524	0.0217758
cg17609703	8168319	OGT	X	BCYRN1;OGT;OGT	NR_001568;NM_181673;NM_181672	chrX:70798022-70798353			NM_181672	OGT	8473	SG0000014716	-0.738095	0.0458333
cg17796348	8095426	STATH	4	STATH;STATH	NM_003154;NM_001009181				NM_001009181	STATH	6779	SG0000012654	-0.761905	0.036756
cg17820060	7918073	COL11A1	1	COL11A1;COL11A1;COL11A1;COL11A1	NM_001854;NM_001168249;NM_080630;NM_080629				NM_080629	COL11A1	1301	SG0000006071	-0.833333	0.015377
cg17820060	7918099	COL11A1	1	COL11A1;COL11A1;COL11A1;COL11A1	NM_001854;NM_001168249;NM_080630;NM_080629				NM_080629	COL11A1	1301	SG0000006071	-0.809524	0.0217758
cg18143869	8083399	MED12L	3	MED12L;P2RY12	NM_053002;NM_022788				NM_053002	MED12L	116931	SG0000014489	-0.761905	0.036756
cg18494192	8129084	COL10A1	6	COL10A1;NT5DC1	NM_000493;NM_152729				NM_000493	COL10A1	1300	SG0000012350	-0.738095	0.0458333
cg18784552	8169451	HTR2C	X	MIR1912;HTR2C	NR_031733;NM_000868				NM_000868	HTR2C	3358	SG0000014724	-0.809524	0.0217758
cg19436270	8152377	CSMD3	8	CSMD3;CSMD3;CSMD3	NM_198124;NM_052900;NM_198123				NM_198124	CSMD3	114788	SG0000016479	-0.809524	0.0217758
cg19436270	8152395	CSMD3	8	CSMD3;CSMD3;CSMD3	NM_198124;NM_052900;NM_198123				NM_198123	CSMD3	114788	SG0000016479	-0.928571	0.00223214
cg19436270	8152435	CSMD3	8	CSMD3;CSMD3;CSMD3	NM_198124;NM_052900;NM_198123				NM_198123	CSMD3	114788	SG0000016479	-0.809524	0.0217758
cg19436270	8152443	CSMD3	8	CSMD3;CSMD3;CSMD3	NM_198124;NM_052900;NM_198123				NM_198123	CSMD3	114788	SG0000016479	-0.761905	0.036756
cg19717061	8089710	ZBTB20	3	ZBTB20;ZBTB20;ZBTB20;ZBTB20;ZBTB20;ZBTB20	NM_001164345;NM_001164346;NM_001164347;NM_001164344;NM_015642;NM_001164343				NM_001164343	ZBTB20	26137	SG0000018172	-0.738095	0.0458333
cg19775718	8142485	ASZ1	7	ASZ1;ASZ1	NM_130768;NR_023315	chr7:117067403-117067666			NR_023315	ASZ1	136991	SG0000015443	-0.785714	0.0279266
cg19874421	8095603	SLC4A4	4	SLC4A4;SLC4A4;SLC4A4	NM_001134742;NM_003759;NM_001098484				NM_001098484	SLC4A4	8671	SG0000008049	-0.738095	0.0458333
cg19874421	8095604	SLC4A4	4	SLC4A4;SLC4A4;SLC4A4	NM_001134742;NM_003759;NM_001098484				NM_001098484	SLC4A4	8671	SG0000008049	-0.809524	0.0217758
cg20120218	8081049	CADM2	3	CADM2;CADM2	NM_001167675;NM_001167674				NM_001167674	CADM2	253559	SG0000017516	-0.785714	0.0279266
cg20364839	7927637	DKK1	10	DKK1	NM_012242	chr10:54073989-54074827			NM_012242	DKK1	22943	SG0000010798	-0.738095	0.0458333
cg21871038	8120189	TFAP2D	6	TFAP2D	NM_172238				NM_172238	TFAP2D	83741	SG0000000819	-0.785714	0.0279266
cg22854591	7933882	JMJD1C	10	JMJD1C	NM_032776	chr10:65224870-65225887			NM_032776	JMJD1C	221037	SG0000017198	-0.809524	0.0217758
cg22854591	7933887	JMJD1C	10	JMJD1C	NM_032776	chr10:65224870-65225887			NM_032776	JMJD1C	221037	SG0000017198	-0.785714	0.0279266
cg22854591	7933897	JMJD1C	10	JMJD1C	NM_032776	chr10:65224870-65225887			NM_032776	JMJD1C	221037	SG0000017198	-0.738095	0.0458333
cg22854591	7933899	JMJD1C	10	JMJD1C	NM_032776	chr10:65224870-65225887			NM_032776	JMJD1C	221037	SG0000017198	-0.928571	0.00223214
cg22906397	8098133	RAPGEF2	4	RAPGEF2	NM_014247				NM_014247	RAPGEF2	9693	SG0000010975	-0.880952	0.00724206
cg22906397	8098134	RAPGEF2	4	RAPGEF2	NM_014247				NM_014247	RAPGEF2	9693	SG0000010975	-0.857143	0.0107143
cg24395545	8174799	CUL4B	X	CUL4B	NM_003588				NM_003588	CUL4B	8450	SG0000015829	-0.809524	0.0217758
cg24395545	8174808	CUL4B	X	CUL4B	NM_003588				NM_003588	CUL4B	8450	SG0000015829	-0.809524	0.0217758
cg24395545	8174810	CUL4B	X	CUL4B	NM_003588				NM_003588	CUL4B	8450	SG0000015829	-0.809524	0.0217758
cg24395545	8174811	CUL4B	X	CUL4B	NM_003588				NM_003588	CUL4B	8450	SG0000015829	-0.785714	0.0279266
cg24395545	8174817	CUL4B	X	CUL4B	NM_003588				NM_003588	CUL4B	8450	SG0000015829	-0.833333	0.015377
cg25300234	8058632	ERBB4	2	ERBB4;ERBB4	NM_005235;NM_001042599				NM_001042599	ERBB4	2066	SG0000017856	-0.761905	0.036756
cg25749982	7965013	CAPS2	12	CAPS2	NM_032606	chr12:75723829-75724206			NM_032606	CAPS2	84698	SG0000018088	-0.785714	0.0279266
cg25749982	7965019	CAPS2	12	CAPS2	NM_032606	chr12:75723829-75724206			NM_032606	CAPS2	84698	SG0000018088	-0.738095	0.0458333

## Sheet: E2_neg rho_Loss
Supp Table 13b. Loci with strong NEGATIVE association (by rho) in changes in DNA methylation (in LOSS of methylation) with changes in gene expression in stage IV (Endo IV) in E2 vs vehicle.
HM450K.ID	Affy_ID	Symbol	CHR	UCSC_RefGene_Name	UCSC_RefGene_Accession	UCSC_CpG_Islands_Name	Regulatory_Feature_Name	Regulatory_Feature_Group	Affy_Refseq	Affy_Symbol.1	Affy_Entrez	Affy_Ensembl	Rho	P val
cg00739644	8070470	TMPRSS2	21	TMPRSS2;TMPRSS2	NM_001135099;NM_005656	chr21:42878751-42880674			NM_001135099	TMPRSS2	7113	SG0000018401	-0.809524	0.0217758
cg02397179	8110943	SEMA5A	5	SEMA5A	NM_003966				NM_003966	SEMA5A	9037	SG0000011290	-0.785714	0.0279266
cg04077303	7910690	GPR137B	1	GPR137B	NM_003272	chr1:236305534-236306674	1:236308073-236308263	Unclassified_Cell_type_specific	NM_003272	GPR137B	7107	SG0000007758	-0.738095	0.0458333
cg05758861	8148525	BAI1	8	BAI1	NM_001702	chr8:143580769-143580975			NM_001702	BAI1	575	SG0000018179	-0.857143	0.0107143
cg06231565	7953015	WNT5B	12	WNT5B;WNT5B	NM_032642;NM_030775	chr12:1739286-1739833	12:1737989-1740783	Unclassified	NM_030775	WNT5B	81029	SG0000011118	-0.809524	0.0217758
cg06231565	7953019	WNT5B	12	WNT5B;WNT5B	NM_032642;NM_030775	chr12:1739286-1739833	12:1737989-1740783	Unclassified	NM_030775	WNT5B	81029	SG0000011118	-0.952381	0.00114087
cg09378783	8132867	EGFR	7	EGFR;EGFR;EGFR;EGFR	NM_201283;NM_201284;NM_201282;NM_005228				NM_005228	EGFR	1956	SG0000014664	-0.761905	0.036756
cg11873462	8153421	ZC3H3	8	ZC3H3	NM_015117		8:144611533-144612058	Unclassified_Cell_type_specific	NM_015117	ZC3H3	23144	SG0000001416	-0.738095	0.0458333
cg13124342	8073904	GRAMD4	22	GRAMD4	NM_015124	chr22:47074658-47074879			NM_015124	GRAMD4	23151	SG0000007524	-0.809524	0.0217758
cg13369686	8144137	PTPRN2	7	PTPRN2;PTPRN2;PTPRN2	NM_002847;NM_130842;NM_130843	chr7:157586711-157587112			NM_002847	PTPRN2	5799	SG0000015509	-0.761905	0.036756
cg13369686	8144142	PTPRN2	7	PTPRN2;PTPRN2;PTPRN2	NM_002847;NM_130842;NM_130843	chr7:157586711-157587112			NM_130843	PTPRN2	5799	SG0000015509	-0.738095	0.0458333
cg20224111	8093024	TNK2	3	TNK2;TNK2	NM_001010938;NM_005781	chr3:195613588-195613966			NM_001010938	TNK2	10188	SG0000006193	-0.809524	0.0217758
cg21811450	8073904	GRAMD4	22	GRAMD4	NM_015124	chr22:47022457-47022659			NM_015124	GRAMD4	23151	SG0000007524	-0.738095	0.0458333
cg22385669	7987331	AQR	15	AQR	NM_014691	chr15:35261686-35262124			NM_014691	AQR	9716	SG0000002177	-0.857143	0.0107143
cg23235965	8117894	HLA-E	6	HLA-E	NM_005516	chr6:30457369-30458175			NM_005516	HLA-E	3133	ENSG00000204592, ENSG00000225201, ENSG00000236632	-0.738095	0.0458333
cg23235965	8117899	HLA-E	6	HLA-E	NM_005516	chr6:30457369-30458175			NM_005516	HLA-E	3133	ENSG00000204592, ENSG00000225201, ENSG00000236632	-0.809524	0.0217758
cg23235965	8177791	HLA-E	6	HLA-E	NM_005516	chr6:30457369-30458175			NM_005516	HLA-E	3133	ENSG00000204592, ENSG00000225201, ENSG00000236632	-0.809524	0.0217758
cg23235965	8177796	HLA-E	6	HLA-E	NM_005516	chr6:30457369-30458175			NM_005516	HLA-E	3133	ENSG00000204592, ENSG00000225201, ENSG00000236632	-0.809524	0.0217758
cg23235965	8179106	HLA-E	6	HLA-E	NM_005516	chr6:30457369-30458175			NM_005516	HLA-E	3133	ENSG00000204592, ENSG00000225201, ENSG00000236632	-0.809524	0.0217758
cg23235965	8179111	HLA-E	6	HLA-E	NM_005516	chr6:30457369-30458175			NM_005516	HLA-E	3133	ENSG00000204592, ENSG00000225201, ENSG00000236632	-0.809524	0.0217758
cg23900681	7981224	ATG2B	14	ATG2B	NM_018036				NM_018036	ATG2B	55102	SG0000006673	-0.761905	0.036756
cg25547286	7972864	TUBGCP3	13	TUBGCP3	NM_006322	chr13:113241711-113241925			NM_006322	TUBGCP3	10426	SG0000012621	-0.761905	0.036756
cg26161708	8065151	RRBP1	20	RRBP1;RRBP1	NM_001042576;NM_004587	chr20:17595271-17595483			NM_001042576	RRBP1	6238	SG0000012584	-0.761905	0.036756

## Sheet: E2_Pos rho_Gain
Supp Table 13c. Loci with strong POSITIVE association (by rho) in changes in DNA methylation (in GAIN of methylation) with changes in gene expression in stage IV (Endo IV) in E2 vs vehicle.
HM450K.ID	Affy_ID	Symbol	CHR	UCSC_RefGene_Name	UCSC_RefGene_Accession	UCSC_CpG_Islands_Name	Regulatory_Feature_Name	Regulatory_Feature_Group	Affy_Refseq	Affy_Symbol.1	Affy_Entrez	Affy_Ensembl	Rho	P val
cg00091960	8142728	GRM8	7	GRM8;GRM8;GRM8	NM_001127323;NR_028041;NM_000845				NM_001127323	GRM8	2918	SG0000017960	0.880952	0.00724206
cg00361380	7989390	VPS13C	15	VPS13C;VPS13C	NM_017684;NM_020821				NM_020821	VPS13C	54832	SG0000012900	0.738095	0.0458333
cg00361380	7989407	VPS13C	15	VPS13C;VPS13C	NM_017684;NM_020821				NM_020821	VPS13C	54832	SG0000012900	0.833333	0.015377
cg00361380	7989421	VPS13C	15	VPS13C;VPS13C	NM_017684;NM_020821				NM_020821	VPS13C	54832	SG0000012900	0.904762	0.00456349
cg00361380	7989423	VPS13C	15	VPS13C;VPS13C	NM_017684;NM_020821				NM_020821	VPS13C	54832	SG0000012900	0.809524	0.0217758
cg00431317	8147068	RALYL	8	RALYL;RALYL;RALYL;RALYL	NM_173848;NM_001100392;NM_001100393;NM_001100391				NM_001100391	RALYL	138046	SG0000018467	0.761905	0.036756
cg00459445	8131505	GLCCI1	7	GLCCI1	NM_138426				NM_138426	GLCCI1	113263	SG0000010641	0.761905	0.036756
cg00904407	8144126	PTPRN2	7	PTPRN2;PTPRN2;PTPRN2	NM_002847;NM_130842;NM_130843	chr7:158361909-158362970			NM_002847	PTPRN2	5799	SG0000015509	0.761905	0.036756
cg02244970	7939919	OR4A15	11	OR4A15	NM_001005275				NM_001005275	OR4A15	81328	SG0000018195	0.904762	0.00456349
cg03504834	8135566	FOXP2	7	FOXP2;FOXP2;FOXP2	NM_148898;NM_148899;NM_014491				NM_148898	FOXP2	93986	SG0000012857	0.738095	0.0458333
cg04235548	8107516	DMXL1	5	DMXL1	NM_005509				NM_005509	DMXL1	1657	SG0000017286	0.738095	0.0458333
cg04770195	7995596	CHD9	16	CHD9	NM_025134				NM_025134	CHD9	80205	SG0000017720	0.738095	0.0458333
cg04844516	8111225	CDH18	5	CDH18;CDH18	NM_001167667;NM_004934				NM_004934	CDH18	1016	SG0000014552	0.833333	0.015377
cg05357137	7932779	MPP7	10	MPP7	NM_173496				NM_173496	MPP7	143098	SG0000015005	0.761905	0.036756
cg07110801	7997923	SPG7	16	SPG7	NM_003119	chr16:89626644-89627869	16:89623057-89624606	Unclassified	NM_003119	SPG7	6687	SG0000019791	0.809524	0.0217758
cg07429087	8115372	NMUR2	5	NMUR2	NM_020167				NM_020167	NMUR2	56923	SG0000013291	0.738095	0.0458333
cg08787988	8051158	IFT172	2	IFT172	NM_015662	chr2:27712554-27712842	2:27712053-27713179	Promoter_Associated	NM_015662	IFT172	26160	SG0000013800	0.761905	0.036756
cg08787988	8051180	IFT172	2	IFT172	NM_015662	chr2:27712554-27712842	2:27712053-27713179	Promoter_Associated	NM_015662	IFT172	26160	SG0000013800	0.785714	0.0279266
cg10500570	8147581	VPS13B	8	MIR599;VPS13B;VPS13B;MIR875	NR_030329;NM_017890;NM_152564;NR_030596				NM_152564	VPS13B	157680	SG0000013254	0.785714	0.0279266
cg10919889	8052116	NRXN1	2	NRXN1;NRXN1	NM_004801;NM_001135659				NM_004801	NRXN1	9378	SG0000017991	0.738095	0.0458333
cg12028740	8149061	CSMD1	8	CSMD1	NM_033225				NM_033225	CSMD1	64478	SG0000018311	0.761905	0.036756
cg13235098	8097169	KIAA1109	4	KIAA1109	NM_015312				NM_015312	KIAA1109	84162	SG0000013868	0.833333	0.015377
cg13235098	8097203	KIAA1109	4	KIAA1109	NM_015312				NM_015312	KIAA1109	84162	SG0000013868	0.785714	0.0279266
cg13235098	8097231	KIAA1109	4	KIAA1109	NM_015312				NM_015312	KIAA1109	84162	SG0000013868	0.809524	0.0217758
cg13280741	8112232	PDE4D	5	PDE4D;PDE4D;PDE4D	NM_001165899;NM_001104631;NM_006203				NM_001165899	PDE4D	5144	SG0000011344	0.809524	0.0217758
cg13445249	8020756	DSG4	18	DSG4;DSG4	NM_001134453;NM_177986				NM_177986	DSG4	147409	SG0000017506	0.833333	0.015377
cg13572369	7950767	DLG2	11	DLG2;DLG2;DLG2;DLG2	NM_001142702;NM_001142699;NM_001364;NM_001142700				NM_001142700	DLG2	1740	SG0000015067	0.833333	0.015377
cg13572369	7950770	DLG2	11	DLG2;DLG2;DLG2;DLG2	NM_001142702;NM_001142699;NM_001364;NM_001142700				NM_001142700	DLG2	1740	SG0000015067	0.761905	0.036756
cg13930665	8160044	PTPRD	9	PTPRD;PTPRD	NM_002839;NM_130391				NM_130391	PTPRD	5789	SG0000015370	0.738095	0.0458333
cg13930665	8160046	PTPRD	9	PTPRD;PTPRD	NM_002839;NM_130391				NM_130391	PTPRD	5789	SG0000015370	0.761905	0.036756
cg13930665	8160056	PTPRD	9	PTPRD;PTPRD	NM_002839;NM_130391				NM_130391	PTPRD	5789	SG0000015370	0.833333	0.015377
cg14063347	8162114	AGTPBP1	9	AGTPBP1	NM_015239				NM_015239	AGTPBP1	23287	SG0000013504	0.738095	0.0458333
cg14063347	8162115	AGTPBP1	9	AGTPBP1	NM_015239				NM_015239	AGTPBP1	23287	SG0000013504	0.809524	0.0217758
cg14937059	8141041	SGCE	7	SGCE;SGCE;SGCE	NM_001099400;NM_001099401;NM_003919				NM_003919	SGCE	8910	SG0000012799	0.738095	0.0458333
cg14937059	8141042	SGCE	7	SGCE;SGCE;SGCE	NM_001099400;NM_001099401;NM_003919				NM_003919	SGCE	8910	SG0000012799	0.785714	0.0279266
cg14937059	8141046	SGCE	7	SGCE;SGCE;SGCE	NM_001099400;NM_001099401;NM_003919				NM_003919	SGCE	8910	SG0000012799	0.785714	0.0279266
cg14937059	8141049	SGCE	7	SGCE;SGCE;SGCE	NM_001099400;NM_001099401;NM_003919				NM_003919	SGCE	8910	SG0000012799	0.809524	0.0217758
cg15554338	8091916	SERPINI2	3	SERPINI2	NM_006217				NM_006217	SERPINI2	5276	SG0000011420	0.928571	0.00674603
cg15943335	8152430	CSMD3	8	CSMD3;CSMD3;CSMD3;MIR2053	NM_198124;NM_052900;NM_198123;NR_031745				NM_198123	CSMD3	114788	SG0000016479	0.904762	0.00456349
cg16511795	8099075	LRPAP1	4	LRPAP1	NM_002337	chr4:3533643-3534788	4:3533127-3535122	Promoter_Associated	NM_002337	LRPAP1	4043	SG0000016395	0.761905	0.036756
cg16740746	7997370	WWOX	16	WWOX;WWOX	NM_016373;NM_130791	chr16:78133174-78134066	16:78132751-78134701	Promoter_Associated	NM_130791	WWOX	51741	SG0000018615	0.785714	0.0279266
cg17526060	8048389	STK36	2	RNF25;STK36	NM_022453;NM_015690	chr2:219536410-219536813			NM_015690	STK36	27148	SG0000016348	0.809524	0.0217758
cg17729873	8175303	FAM127B	X	FAM127B;FAM127B	NM_001078172;NM_001134321	chrX:134185563-134186337	X:134185997-134186694	Promoter_Associated	NM_001078172	FAM127B	26071	SG0000020395	0.928571	0.00223214
cg17796348	8095428	STATH	4	STATH;STATH	NM_003154;NM_001009181				NM_001009181	STATH	6779	SG0000012654	0.874267	0.00451239
cg17820060	7918095	COL11A1	1	COL11A1;COL11A1;COL11A1;COL11A1	NM_001854;NM_001168249;NM_080630;NM_080629				NM_080629	COL11A1	1301	SG0000006071	0.761905	0.036756
cg17820060	7918101	COL11A1	1	COL11A1;COL11A1;COL11A1;COL11A1	NM_001854;NM_001168249;NM_080630;NM_080629				NM_080629	COL11A1	1301	SG0000006071	0.738095	0.0458333
cg17820060	7918102	COL11A1	1	COL11A1;COL11A1;COL11A1;COL11A1	NM_001854;NM_001168249;NM_080630;NM_080629				NM_080629	COL11A1	1301	SG0000006071	0.738095	0.0458333
cg18143869	8083377	MED12L	3	MED12L;P2RY12	NM_053002;NM_022788				NM_053002	MED12L	116931	SG0000014489	0.833333	0.015377
cg18594701	7939917	OR4A16	11	OR4A16	NM_001005274				NM_001005274	OR4A16	81327	SG0000018196	0.761905	0.036756
cg18785532	7962330	SLC2A13	12	SLC2A13	NM_052885				NM_052885	SLC2A13	114134	SG0000015122	0.761905	0.036756
cg19436270	8152397	CSMD3	8	CSMD3;CSMD3;CSMD3	NM_198124;NM_052900;NM_198123				NM_198124	CSMD3	114788	SG0000016479	0.785714	0.0279266
cg19436270	8152447	CSMD3	8	CSMD3;CSMD3;CSMD3	NM_198124;NM_052900;NM_198123				NM_198123	CSMD3	114788	SG0000016479	0.738095	0.0458333
cg19775718	8142483	ASZ1	7	ASZ1;ASZ1	NM_130768;NR_023315	chr7:117067403-117067666			NR_023315	ASZ1	136991	SG0000015443	0.738095	0.0458333
cg19775718	8142493	ASZ1	7	ASZ1;ASZ1	NM_130768;NR_023315	chr7:117067403-117067666			NR_023315	ASZ1	136991	SG0000015443	0.880952	0.00724206
cg20229609	8121912	CENPW	6	C6orf173	NM_001012507	chr6:126661135-126661387	6:126660868-126661590	Promoter_Associated	NM_001012507	CENPW	387103	SG0000020376	0.833333	0.015377
cg20229609	8121915	CENPW	6	C6orf173	NM_001012507	chr6:126661135-126661387	6:126660868-126661590	Promoter_Associated	NM_001012507	CENPW	387103	SG0000020376	0.761905	0.036756
cg20722891	7954281	AEBP2	12	AEBP2;AEBP2	NM_153207;NM_001114176				NM_001114176	AEBP2	121536	SG0000013915	0.738095	0.0458333
cg20722891	7954288	AEBP2	12	AEBP2;AEBP2	NM_153207;NM_001114176				NM_001114176	AEBP2	121536	SG0000013915	0.738095	0.0458333
cg21568206	8044885	EPB41L5	2	EPB41L5	NM_020909				NM_020909	EPB41L5	57669	SG0000011510	0.761905	0.036756
cg21568206	8044896	EPB41L5	2	EPB41L5	NM_020909				NM_020909	EPB41L5	57669	SG0000011510	0.833333	0.015377
cg21871038	8120193	TFAP2D	6	TFAP2D	NM_172238				NM_172238	TFAP2D	83741	SG0000000819	0.738095	0.0458333
cg23165983	8167661	MAGED1	X	MAGED1	NM_001005332				NM_001005332	MAGED1	9500	SG0000017922	0.738095	0.0458333
cg23165983	8167670	MAGED1	X	MAGED1	NM_001005332				NM_001005332	MAGED1	9500	SG0000017922	0.833333	0.015377
cg24003216	8147600	VPS13B	8	VPS13B;VPS13B	NM_017890;NM_152564				NM_152564	VPS13B	157680	SG0000013254	0.738095	0.0458333
cg24003216	8147646	VPS13B	8	VPS13B;VPS13B	NM_017890;NM_152564				NM_152564	VPS13B	157680	SG0000013254	0.761905	0.036756
cg24905196	8089959	IQCB1	3	IQCB1;IQCB1;EAF2	NM_001023570;NM_001023571;NM_018456	chr3:121553820-121554236	3:121553330-121555273	Promoter_Associated	NM_001023571	IQCB1	9657	SG0000017322	0.761905	0.036756
cg24905196	8089964	IQCB1	3	IQCB1;IQCB1;EAF2	NM_001023570;NM_001023571;NM_018456	chr3:121553820-121554236	3:121553330-121555273	Promoter_Associated	NM_001023571	IQCB1	9657	SG0000017322	0.880952	0.00724206
cg24905196	8089965	IQCB1	3	IQCB1;IQCB1;EAF2	NM_001023570;NM_001023571;NM_018456	chr3:121553820-121554236	3:121553330-121555273	Promoter_Associated	NM_001023571	IQCB1	9657	SG0000017322	0.761905	0.036756
cg25485651	7965438	EEA1	12	EEA1	NM_003566				NM_003566	EEA1	8411	SG0000010218	0.785714	0.0279266
cg25485651	7965454	EEA1	12	EEA1	NM_003566				NM_003566	EEA1	8411	SG0000010218	0.785714	0.0279266
cg26381514	7961912	ITPR2	12	ITPR2	NM_002223				NM_002223	ITPR2	3709	SG0000012310	0.833333	0.015377
cg26381514	7961939	ITPR2	12	ITPR2	NM_002223				NM_002223	ITPR2	3709	SG0000012310	0.738095	0.0458333
cg26381514	7961942	ITPR2	12	ITPR2	NM_002223				NM_002223	ITPR2	3709	SG0000012310	0.785714	0.0279266
cg26725786	8145542	EPHX2	8	EPHX2	NM_001979	chr8:27348658-27348883			NM_001979	EPHX2	2053	SG0000012091	0.809524	0.0217758
cg26725786	8145551	EPHX2	8	EPHX2	NM_001979	chr8:27348658-27348883			NM_001979	EPHX2	2053	SG0000012091	0.809524	0.0217758
cg27374881	8084703	EIF4A2	3	SNORA63;MIR1248;EIF4A2;SNORA81;SNORA4	NR_002586;NR_031650;NM_001967;NR_002989;NR_002588	chr3:186500738-186502048			NM_001967	EIF4A2	1974	SG0000015697	0.833333	0.015377
cg27551697	7917619	HFM1	1	HFM1	NM_001017975				NM_001017975	HFM1	164045	SG0000016266	0.766481	0.02652
cg27640254	8046143	DHRS9	2	DHRS9	NM_005771				NM_005771	DHRS9	10170	SG0000007373	0.785714	0.0279266

## Sheet: E2_Pos rho_Loss
Supp Table 13d. Loci with strong POSITIVE association (by rho) in changes in DNA methylation (in LOSS of methylation) with changes in gene expression in stage IV (Endo IV) in E2 vs vehicle.
HM450K.ID	Affy_ID	Symbol	CHR	UCSC_RefGene_Name	UCSC_RefGene_Accession	UCSC_CpG_Islands_Name	Regulatory_Feature_Name	Regulatory_Feature_Group	Affy_Refseq	Affy_Symbol.1	Affy_Entrez	Affy_Ensembl	Rho	P val
cg02442693	8175245	GPC3	X	GPC3;GPC3;GPC3;GPC3	NM_001164617;NM_001164618;NM_001164619;NM_004484	chrX:133118081-133118494			NM_004484	GPC3	2719	SG0000014725	0.738095	0.0458333
cg04015501	7972846	TUBGCP3	13	TUBGCP3	NM_006322	chr13:113201706-113201927			NM_006322	TUBGCP3	10426	SG0000012621	0.833333	0.015377
cg05110803	7986384	IGF1R	15	IGF1R	NM_000875				NM_000875	IGF1R	3480	SG0000014044	0.761905	0.036756
cg05260877	7943403	YAP1	11	YAP1;YAP1	NM_001130145;NM_006106				NM_001130145	YAP1	10413	SG0000013769	0.809524	0.0217758
cg05260877	7943406	YAP1	11	YAP1;YAP1	NM_001130145;NM_006106				NM_006106	YAP1	10413	SG0000013769	0.738095	0.0458333
cg05512420	8026143	NFIX	19	NFIX	NM_002501	chr19:13207375-13207621	19:13206094-13207636	Unclassified	NM_002501	NFIX	4784	SG0000000844	0.738095	0.0458333
cg05512420	8026154	NFIX	19	NFIX	NM_002501	chr19:13207375-13207621	19:13206094-13207636	Unclassified	NM_002501	NFIX	4784	SG0000000844	0.761905	0.036756
cg05758861	8148540	BAI1	8	BAI1	NM_001702	chr8:143580769-143580975			NM_001702	BAI1	575	SG0000018179	0.857143	0.0107143
cg05758861	8148547	BAI1	8	BAI1	NM_001702	chr8:143580769-143580975			NM_001702	BAI1	575	SG0000018179	0.833333	0.015377
cg10111629	7918579	ST7L	1	ST7L;ST7L;ST7L	NM_017744;NM_138728;NM_138727				NM_017744	ST7L	54879	SG0000000734	0.738095	0.0458333
cg10111629	7918585	ST7L	1	ST7L;ST7L;ST7L	NM_017744;NM_138728;NM_138727				NM_138727	ST7L	54879	SG0000000734	0.809524	0.0217758
cg13142612	8070663	U2AF1	21	U2AF1;U2AF1;U2AF1	NM_001025203;NM_001025204;NM_006758	chr21:44515262-44515560			NM_006758	U2AF1	7307	SG0000016020	0.785714	0.0279266
cg13369686	8144136	PTPRN2	7	PTPRN2;PTPRN2;PTPRN2	NM_002847;NM_130842;NM_130843	chr7:157586711-157587112			NM_130843	PTPRN2	5799	SG0000015509	0.738095	0.0458333
cg16053745	8093140	C3orf43	3	C3orf43	NM_001077657				NM_001077657	C3orf43	255798	SG0000021409	0.857143	0.0107143
cg16717713	7981275	CCDC85C	14	CCDC85C	NM_001144995	chr14:100069475-100071813			NM_001144995	CCDC85C	317762	SG0000020547	0.785714	0.0279266
cg17202519	7950782	DLG2	11	DLG2;DLG2	NM_001364;NM_001142699				NM_001364	DLG2	1740	SG0000015067	0.761905	0.036756
cg17202519	7950783	DLG2	11	DLG2;DLG2	NM_001364;NM_001142699				NM_001142699	DLG2	1740	SG0000015067	0.761905	0.036756
cg17202519	7950789	DLG2	11	DLG2;DLG2	NM_001364;NM_001142699				NM_001142699	DLG2	1740	SG0000015067	0.809524	0.0217758
cg23300486	7977027	TRAF3	14	TRAF3;TRAF3;TRAF3	NM_145726;NM_003300;NM_145725				NM_145725	TRAF3	7187	SG0000013132	0.904762	0.00456349
cg24172509	8108761	PCDHGA2	5	PCDHGA4;PCDHGB5;PCDHGA6;PCDHGA1;PCDHGA8;PCDHGA5;PCDHGB1;PCDHGB5;PCDHGB4;PCDHGA3;PCDHGA2;PCDHGA7;PCDHGB2;PCDHGB3	NM_018917;NM_032099;NM_018919;NM_018912;NM_032088;NM_018918;NM_018922;NM_018925;NM_003736;NM_018916;NM_018915;NM_018920;NM_018923;NM_018924	chr5:140779013-140779659			NM_018915	PCDHGA2	56113	ENSG00000081853, ENSG00000240184, ENSG00000240764, ENSG00000242419	0.785714	0.0279266
cg26161708	8065161	RRBP1	20	RRBP1;RRBP1	NM_001042576;NM_004587	chr20:17595271-17595483			NM_001042576	RRBP1	6238	SG0000012584	0.738095	0.0458333
cg27501362	8071898	SPECC1L	22	CYTSA;CYTSA	NM_015330;NM_001145468				NM_001145468	SPECC1L	23384	SG0000010001	0.952381	0.00114087

## Sheet: P4_neg rho_gain
Supp Table 13e. Loci with strong NEGATIVE association (by rho) in changes in DNA methylation (in GAIN of methylation) with changes in gene expression in stage IV (Endo IV) in P4 vs vehicle.
HM450K.ID	Affy_ID	Symbol	CHR	UCSC_RefGene_Name	UCSC_RefGene_Accession	UCSC_CpG_Islands_Name	Regulatory_Feature_Name	Regulatory_Feature_Group	Affy_Refseq	Affy_Symbol.1	Affy_Entrez	Affy_Ensembl	Rho	P val
cg00361380	7989397	VPS13C	15	VPS13C;VPS13C	NM_017684;NM_020821				NM_020821	VPS13C	54832	SG0000012900	-0.738095	0.0458333
cg00361380	7989429	VPS13C	15	VPS13C;VPS13C	NM_017684;NM_020821				NM_020821	VPS13C	54832	SG0000012900	-0.857143	0.0107143
cg00361380	7989449	VPS13C	15	VPS13C;VPS13C	NM_017684;NM_020821				NM_020821	VPS13C	54832	SG0000012900	-0.761905	0.036756
cg00361380	7989457	VPS13C	15	VPS13C;VPS13C	NM_017684;NM_020821				NM_020821	VPS13C	54832	SG0000012900	-0.738095	0.0458333
cg00464796	7988993	WDR72	15	WDR72	NM_182758				NM_182758	WDR72	256764	SG0000016641	-0.761905	0.036756
cg02857557	7930930	INPP5F	10	INPP5F;INPP5F	NM_014937;NR_003252	chr10:121577529-121578385			NR_003252	INPP5F	22876	SG0000019882	-0.809524	0.0217758
cg02857557	7930935	INPP5F	10	INPP5F;INPP5F	NM_014937;NR_003252	chr10:121577529-121578385			NR_003252	INPP5F	22876	SG0000019882	-0.761905	0.036756
cg03504834	8135553	FOXP2	7	FOXP2;FOXP2;FOXP2	NM_148898;NM_148899;NM_014491				NM_014491	FOXP2	93986	SG0000012857	-0.785714	0.0279266
cg04438558	8108765	PCDHGA3	5	PCDHGA2;PCDHGA3;PCDHGA3;PCDHGA1	NM_018915;NM_018916;NM_032011;NM_018912	chr5:140723548-140723900	5:140723245-140723939	NonGene_Associated	NM_032011	PCDHGA3	56112	ENSG00000081853, ENSG00000240184, ENSG00000240764, ENSG00000242419, ENSG00000254245	-0.785714	0.0279266
cg05225993	8143682	EZH2	7	EZH2;EZH2	NM_152998;NM_004456				NM_004456	EZH2	2146	SG0000010646	-0.928571	0.00223214
cg06022698	8121666	RFX6	6	RFX6	NM_173560	chr6:117198089-117198705			NM_173560	RFX6	222546	SG0000018500	-0.857143	0.0107143
cg06786630	8085103	SUMF1	3	SUMF1;SUMF1;SUMF1	NM_001164674;NM_182760;NM_001164675	chr3:4508608-4508964			NM_001164674	SUMF1	285362	SG0000014445	-0.738095	0.0458333
cg06786630	8085108	SUMF1	3	SUMF1;SUMF1;SUMF1	NM_001164674;NM_182760;NM_001164675	chr3:4508608-4508964			NM_001164675	SUMF1	285362	SG0000014445	-0.880952	0.00724206
cg08262269	8056549	STK39	2	STK39	NM_013233				NM_013233	STK39	27347	SG0000019864	-0.761905	0.036756
cg08262269	8056555	STK39	2	STK39	NM_013233				NM_013233	STK39	27347	SG0000019864	-0.738095	0.0458333
cg08464958	8171163	ARSE	X	ARSE	NM_000047				NM_000047	ARSE	415	SG0000015739	-0.809524	0.0217758
cg09288320	8058586	C2orf67	2	C2orf67	NM_152519				NM_152519	C2orf67	151050	SG0000014444	-0.833333	0.015377
cg10030980	8140580	CACNA2D1	7	CACNA2D1	NM_000722				NM_000722	CACNA2D1	781	SG0000015395	-0.761905	0.036756
cg10030980	8140613	CACNA2D1	7	CACNA2D1	NM_000722				NM_000722	CACNA2D1	781	SG0000015395	-0.952381	0.00114087
cg10591607	8121236	GRIK2	6	GRIK2;GRIK2;GRIK2;GRIK2;GRIK2;GRIK2	NM_175768;NM_021956;NM_175768;NM_001166247;NM_021956;NM_001166247	chr6:101846766-101847135			NM_175768	GRIK2	2898	SG0000016441	-0.880952	0.00724206
cg10823844	8150333	FGFR1	8	FGFR1;FGFR1;FGFR1;FGFR1;FGFR1;FGFR1;FGFR1	NM_023111;NM_023110;NM_015850;NM_023105;NM_023106;NM_023108;NM_023107	chr8:38325091-38326374			NM_023110	FGFR1	2260	ENSG00000077782, ENSG00000249195	-0.928571	0.00223214
cg10823844	8150342	FGFR1	8	FGFR1;FGFR1;FGFR1;FGFR1;FGFR1;FGFR1;FGFR1	NM_023111;NM_023110;NM_015850;NM_023105;NM_023106;NM_023108;NM_023107	chr8:38325091-38326374			NM_023106	FGFR1	2260	ENSG00000077782, ENSG00000249195	-0.761905	0.036756
cg12280113	8039542	NLRP9	19	NLRP9	NM_176820				NM_176820	NLRP9	338321	SG0000018579	-0.785714	0.0279266
cg12280113	8039543	NLRP9	19	NLRP9	NM_176820				NM_176820	NLRP9	338321	SG0000018579	-0.952381	0.00114087
cg13220569	7953283	KCNA5	12	KCNA5;KCNA5	NM_002234;NM_002234	chr12:5153012-5154346			NM_002234	KCNA5	3741	SG0000013003	-0.809524	0.0217758
cg13389575	7969037	RB1	13	RB1	NM_000321	chr13:48890957-48891549			NM_000321	RB1	5925	SG0000013968	-0.738095	0.0458333
cg13389575	7969045	RB1	13	RB1	NM_000321	chr13:48890957-48891549			NM_000321	RB1	5925	SG0000013968	-0.738095	0.0458333
cg13628057	8159715	EHMT1	9	EHMT1;EHMT1	NM_024757;NM_001145527				NM_001145527	EHMT1	79813	SG0000018109	-0.833333	0.015377
cg14203158	7926267	MCM10	10	MCM10;MCM10	NM_018518;NM_182751	chr10:13203436-13203790			NM_182751	MCM10	55388	SG0000006532	-0.857143	0.0107143
cg14203158	7926274	MCM10	10	MCM10;MCM10	NM_018518;NM_182751	chr10:13203436-13203790			NM_182751	MCM10	55388	SG0000006532	-0.738095	0.0458333
cg14203158	7926281	MCM10	10	MCM10;MCM10	NM_018518;NM_182751	chr10:13203436-13203790			NM_182751	MCM10	55388	SG0000006532	-0.833333	0.015377
cg14259208	8156784	COL15A1	9	COL15A1	NM_001855				NM_001855	COL15A1	1306	SG0000020429	-0.833333	0.015377
cg14259208	8156811	COL15A1	9	COL15A1	NM_001855				NM_001855	COL15A1	1306	SG0000020429	-0.738095	0.0458333
cg15590780	7924283	USH2A	1	USH2A;USH2A;USH2A;USH2A	NM_007123;NM_206933;NM_206933;NM_007123				NM_007123	USH2A	7399	SG0000004278	-0.904762	0.00456349
cg15900051	8122993	SNX9	6	SNX9	NM_016224	chr6:158243601-158245035			NM_016224	SNX9	51429	SG0000013034	-0.761905	0.036756
cg15900051	8122995	SNX9	6	SNX9	NM_016224	chr6:158243601-158245035			NM_016224	SNX9	51429	SG0000013034	-0.857143	0.0107143
cg15900051	8122997	SNX9	6	SNX9	NM_016224	chr6:158243601-158245035			NM_016224	SNX9	51429	SG0000013034	-0.904762	0.00456349
cg15900051	8123000	SNX9	6	SNX9	NM_016224	chr6:158243601-158245035			NM_016224	SNX9	51429	SG0000013034	-0.738095	0.0458333
cg17603763	7943292	SRSF8	11	SFRS2B	NM_032102	chr11:94800243-94801117			NM_032102	SRSF8	10929	SG0000018077	-0.809524	0.0217758
cg17665601	8152873	ASAP1	8	ASAP1	NM_018482				NM_018482	ASAP1	50807	SG0000015331	-0.857143	0.0107143
cg17886662	7929528	C10orf131	10	C10orf131	NM_001130446	chr10:97667243-97667978			NM_001130446	C10orf131	100127889	SG0000017308	-0.761905	0.036756
cg18957463	8100161	CORIN	4	CORIN	NM_006587				NM_006587	CORIN	10699	SG0000014524	-0.833333	0.015377
cg19431346	8077286	CHL1	3	CHL1	NM_006614				NM_006614	CHL1	10752	SG0000013412	-0.809524	0.0217758
cg19431346	8077294	CHL1	3	CHL1	NM_006614				NM_006614	CHL1	10752	SG0000013412	-0.952381	0.00114087
cg19718360	7921648	CD84	1	CD84	NM_003874				NM_003874	CD84	8832	SG0000006629	-0.833333	0.015377
cg21005240	7961780	KIAA0528	12	KIAA0528	NM_014802				NM_014802	KIAA0528	9847	SG0000011173	-0.761905	0.036756
cg21005240	7961791	KIAA0528	12	KIAA0528	NM_014802				NM_014802	KIAA0528	9847	SG0000011173	-0.833333	0.015377
cg21149266	7983941	FAM63B	15	FAM63B;FAM63B	NM_001040450;NM_001040453				NM_001040450	FAM63B	54629	SG0000012892	-0.738095	0.0458333
cg21960191	8042243	EHBP1	2	LOC100132215;EHBP1;EHBP1;EHBP1;EHBP1	NR_027069;NM_001142616;NM_001142615;NM_001142614;NM_015252	chr2:63272127-63272409			NM_015252	EHBP1	23301	SG0000011550	-0.904762	0.00456349
cg22854591	7933889	JMJD1C	10	JMJD1C	NM_032776	chr10:65224870-65225887			NM_032776	JMJD1C	221037	SG0000017198	-0.761905	0.036756
cg22854591	7933897	JMJD1C	10	JMJD1C	NM_032776	chr10:65224870-65225887			NM_032776	JMJD1C	221037	SG0000017198	-0.833333	0.015377
cg25953453	8061695	TM9SF4	20	TM9SF4	NM_014742		20:30696907-30698228	Promoter_Associated	NM_014742	TM9SF4	9777	SG0000010133	-0.809524	0.0217758
cg25953453	8061704	TM9SF4	20	TM9SF4	NM_014742		20:30696907-30698228	Promoter_Associated	NM_014742	TM9SF4	9777	SG0000010133	-0.833333	0.015377
cg26229092	7926930	ZEB1	10	ZEB1;ZEB1;ZEB1;ZEB1;ZEB1	NM_001128128;NR_024286;NM_030751;NR_024287;NR_024285				NM_030751	ZEB1	6935	SG0000014851	-0.738095	0.0458333
cg26725786	8145533	EPHX2	8	EPHX2	NM_001979	chr8:27348658-27348883			NM_001979	EPHX2	2053	SG0000012091	-0.761905	0.036756
cg26725786	8145541	EPHX2	8	EPHX2	NM_001979	chr8:27348658-27348883			NM_001979	EPHX2	2053	SG0000012091	-0.809524	0.0217758
cg27182510	8129443	PTPRK	6	PTPRK;PTPRK	NM_002844;NM_001135648				NM_001135648	PTPRK	5796	SG0000015289	-0.833333	0.015377

## Sheet: P4_neg rho_Loss
Supp Table 13f. Loci with strong NEGATIVE association (by rho) in changes in DNA methylation (in LOSS of methylation) with changes in gene expression in stage IV (Endo IV) in P4 vs vehicle.
HM450K.ID	Affy_ID	Symbol	CHR	UCSC_RefGene_Name	UCSC_RefGene_Accession	UCSC_CpG_Islands_Name	Regulatory_Feature_Name	Regulatory_Feature_Group	Affy_Refseq	Affy_Symbol.1	Affy_Entrez	Affy_Ensembl	Rho	P val
cg00262344	8020697	PSMA8	18	PSMA8;PSMA8;PSMA8	NM_144662;NM_001025097;NM_001025096	chr18:23713728-23713953	18:23713712-23714394	Unclassified_Cell_type_specific	NM_144662	PSMA8	143471	SG0000015461	-0.809524	0.0217758
cg00401463	7931425	JAKMIP3	10	JAKMIP3	NM_001105521				NM_001105521	JAKMIP3	282973	SG0000018838	-0.833333	0.015377
cg05109065	8168405	CHIC1	X	LOC139201;CHIC1	NR_029423;NM_001039840	chrX:72782945-72783165	X:72782592-72783937	Promoter_Associated	NM_001039840	CHIC1	53344	SG0000020411	-0.761905	0.036756
cg05325182	8026206	ZSWIM4	19	ZSWIM4	NM_023072	chr19:13915618-13915840	19:13915660-13915921	Unclassified_Cell_type_specific	NM_023072	ZSWIM4	65249	SG0000013200	-0.761905	0.036756
cg06353098	7963436	KRT5	12	KRT5	NM_000424				NM_000424	KRT5	3852	SG0000018608	-0.952381	0.00114087
cg06569826	8002836	LDHD	16	LDHD;LDHD	NM_194436;NM_153486	chr16:75148398-75148864			NM_194436	LDHD	197257	SG0000016681	-0.880952	0.00724206
cg09378783	8132885	EGFR	7	EGFR;EGFR;EGFR;EGFR	NM_201283;NM_201284;NM_201282;NM_005228				NM_005228	EGFR	1956	SG0000014664	-0.904762	0.00456349
cg10033725	8131002	HEATR2	7	HEATR2	NM_017802	chr7:821689-822634	7:825963-826393	Gene_Associated	NM_017802	HEATR2	54919	SG0000016481	-0.785714	0.0279266
cg10033725	8131010	HEATR2	7	HEATR2	NM_017802	chr7:821689-822634	7:825963-826393	Gene_Associated	NM_017802	HEATR2	54919	SG0000016481	-0.928571	0.00223214
cg14001023	8037744	PGLYRP1	19	PGLYRP1;PGLYRP1	NM_005091;NM_005091	chr19:46526046-46526334			NM_005091	PGLYRP1	8993	SG0000000843	-0.761905	0.036756
cg14178013	8157158	PALM2-AKAP2	9	PALM2-AKAP2;PALM2-AKAP2	NM_147150;NM_007203				NM_007203	PALM2-AKAP2	445815	ENSG00000157654, ENSG00000241978	-0.785714	0.0279266
cg14178013	8157159	PALM2-AKAP2	9	PALM2-AKAP2;PALM2-AKAP2	NM_147150;NM_007203				NM_007203	PALM2-AKAP2	445815	ENSG00000157654, ENSG00000241978	-0.833333	0.015377
cg15550618	8119872	POLH	6	POLH	NM_006502		6:43576031-43576341	Unclassified_Cell_type_specific	NM_006502	POLH	5429	SG0000017073	-0.761905	0.036756
cg16524049	7921942	LMX1A	1	LMX1A	NM_177398	chr1:165204501-165205507			NM_177398	LMX1A	4009	SG0000016276	-0.785714	0.0279266
cg16533314	7992977	DNAJA3	16	DNAJA3;DNAJA3	NM_005147;NM_001135110	chr16:4475429-4476330			NM_001135110	DNAJA3	9093	SG0000010342	-0.833333	0.015377
cg16613938	8024318	APC2	19	APC2	NM_005883	chr19:1472935-1473210			NM_005883	APC2	10297	SG0000011526	-0.761905	0.036756
cg18795786	7954907	CNTN1	12	CNTN1;CNTN1	NM_175038;NM_001843	chr12:41086522-41087102			NM_001843	CNTN1	1272	SG0000001823	-0.785714	0.0279266
cg18795786	7954910	CNTN1	12	CNTN1;CNTN1	NM_175038;NM_001843	chr12:41086522-41087102			NM_001843	CNTN1	1272	SG0000001823	-0.738095	0.0458333
cg18795786	7954911	CNTN1	12	CNTN1;CNTN1	NM_175038;NM_001843	chr12:41086522-41087102			NM_001843	CNTN1	1272	SG0000001823	-0.928571	0.00223214
cg18795786	7954925	CNTN1	12	CNTN1;CNTN1	NM_175038;NM_001843	chr12:41086522-41087102			NM_001843	CNTN1	1272	SG0000001823	-0.785714	0.0279266
cg21342785	8150441	ANK1	8	ANK1	NM_001142446				NM_001142446	ANK1	286	SG0000002953	-0.809524	0.0217758
cg21342785	8150467	ANK1	8	ANK1	NM_001142446				NM_001142446	ANK1	286	SG0000002953	-0.738095	0.0458333
cg21342785	8150472	ANK1	8	ANK1	NM_001142446				NM_001142446	ANK1	286	SG0000002953	-0.904762	0.00456349
cg22385669	7987341	AQR	15	AQR	NM_014691	chr15:35261686-35262124			NM_014691	AQR	9716	SG0000002177	-0.738095	0.0458333
cg23347850	8138217	ICA1	7	ICA1;ICA1;ICA1	NM_004968;NM_022307;NM_001136020				NM_001136020	ICA1	3382	SG0000000314	-0.785714	0.0279266
cg24795825	7985229	MORF4L1	15	MORF4L1;MORF4L1	NM_206839;NM_006791	chr15:79165102-79166057			NM_206839	MORF4L1	10933	SG0000018578	-0.809524	0.0217758
cg25105522	8007791	MAP3K14	17	MAP3K14	NM_003954		17:43353830-43355578	Unclassified	NM_003954	MAP3K14	9020	SG0000000606	-0.857143	0.0107143
cg27657926	8131394	USP42	7	USP42	NM_032172	chr7:6193413-6194678	7:6193836-6194081	Unclassified_Cell_type_specific	NM_032172	USP42	84132	SG0000010634	-0.880952	0.00724206
cg27657926	8131397	USP42	7	USP42	NM_032172	chr7:6193413-6194678	7:6193836-6194081	Unclassified_Cell_type_specific	NM_032172	USP42	84132	SG0000010634	-0.738095	0.0458333

## Sheet: P4_Pos rho_gain
Supp Table 13g. Loci with strong POSITIVE association (by rho) in changes in DNA methylation (in GAIN of methylation) with changes in gene expression in stage IV (Endo IV) in P4 vs vehicle.
HM450K.ID	Affy_ID	Symbol	CHR	UCSC_RefGene_Name	UCSC_RefGene_Accession	UCSC_CpG_Islands_Name	Regulatory_Feature_Name	Regulatory_Feature_Group	Affy_Refseq	Affy_Symbol.1	Affy_Entrez	Affy_Ensembl	Rho	P val
cg00044107	8127585	COL12A1	6	COL12A1;COL12A1	NM_080645;NM_004370	chr6:75794880-75795088			NM_004370	COL12A1	1303	SG0000011179	0.809524	0.0217758
cg00044107	8127607	COL12A1	6	COL12A1;COL12A1	NM_080645;NM_004370	chr6:75794880-75795088			NM_004370	COL12A1	1303	SG0000011179	0.738095	0.0458333
cg00044107	8127617	COL12A1	6	COL12A1;COL12A1	NM_080645;NM_004370	chr6:75794880-75795088			NM_004370	COL12A1	1303	SG0000011179	0.809524	0.0217758
cg00326648	8052429	PUS10	2	PEX13;PUS10	NM_002618;NM_144709				NM_144709	PUS10	150962	SG0000016292	0.809524	0.0217758
cg02857557	7930929	INPP5F	10	INPP5F;INPP5F	NM_014937;NR_003252	chr10:121577529-121578385			NR_003252	INPP5F	22876	SG0000019882	0.809524	0.0217758
cg03853620	8141099	PDK4	7	PDK4	NM_002612	chr7:95225503-95226194			NM_002612	PDK4	5166	SG0000000479	0.761905	0.036756
cg03853620	8141100	PDK4	7	PDK4	NM_002612	chr7:95225503-95226194			NM_002612	PDK4	5166	SG0000000479	0.904762	0.00456349
cg03853620	8141101	PDK4	7	PDK4	NM_002612	chr7:95225503-95226194			NM_002612	PDK4	5166	SG0000000479	0.785714	0.0279266
cg03853620	8141105	PDK4	7	PDK4	NM_002612	chr7:95225503-95226194			NM_002612	PDK4	5166	SG0000000479	0.738095	0.0458333
cg03922048	8146641	YTHDF3	8	YTHDF3	NM_152758	chr8:64080674-64081766			NM_152758	YTHDF3	253943	NA	0.785714	0.0279266
cg04334108	8097708	TMEM184C	4	TMEM184C	NM_018241				NM_018241	TMEM184C	55751	SG0000016416	0.761905	0.036756
cg04438558	8108817	PCDHGA1	5	PCDHGA2;PCDHGA3;PCDHGA3;PCDHGA1	NM_018915;NM_018916;NM_032011;NM_018912	chr5:140723548-140723900	5:140723245-140723939	NonGene_Associated	NM_018912	PCDHGA1	56114	ENSG00000081853, ENSG00000204956, ENSG00000240184, ENSG00000240764, ENSG00000242419	0.904762	0.00456349
cg05217312	7926684	KIAA1217	10	KIAA1217	NM_001098500				NM_001098500	KIAA1217	56243	SG0000012054	0.785714	0.0279266
cg08155109	8098313	GALNTL6	4	GALNTL6	NM_001034845				NM_001034845	GALNTL6	442117	SG0000017447	0.904762	0.00456349
cg09095080	8102031	UBE2D3	4	UBE2D3;UBE2D3	NM_181893;NM_181890	chr4:103789994-103790510			NM_181890	UBE2D3	7323	SG0000010933	0.928571	0.00223214
cg09095080	8102034	UBE2D3	4	UBE2D3;UBE2D3	NM_181893;NM_181890	chr4:103789994-103790510			NM_181890	UBE2D3	7323	SG0000010933	0.761905	0.036756
cg10158821	7952047	MPZL2	11	MPZL2;MPZL2	NM_005797;NM_144765				NM_144765	MPZL2	10205	SG0000014957	0.809524	0.0217758
cg10591607	8121235	GRIK2	6	GRIK2;GRIK2;GRIK2;GRIK2;GRIK2;GRIK2	NM_175768;NM_021956;NM_175768;NM_001166247;NM_021956;NM_001166247	chr6:101846766-101847135			NM_001166247	GRIK2	2898	SG0000016441	0.880952	0.00724206
cg10591607	8121246	GRIK2	6	GRIK2;GRIK2;GRIK2;GRIK2;GRIK2;GRIK2	NM_175768;NM_021956;NM_175768;NM_001166247;NM_021956;NM_001166247	chr6:101846766-101847135			NM_001166247	GRIK2	2898	SG0000016441	0.833333	0.015377
cg10772991	8084980	SENP5	3	SENP5	NM_152699	chr3:196594576-196595486	3:196594123-196595667	Promoter_Associated	NM_152699	SENP5	205564	SG0000011923	0.761905	0.036756
cg11909989	8148335	EFR3A	8	EFR3A	NM_015137				NM_015137	EFR3A	23167	SG0000013229	0.761905	0.036756
cg12419383	8167420	PQBP1	X	PQBP1;PQBP1;PQBP1;PQBP1;PQBP1;PQBP1;TIMM17B;PQBP1;TIMM17B;PQBP1;PQBP1;PQBP1;PQBP1	NM_001032384;NM_001167989;NM_001167992;NM_005710;NM_001032384;NM_005710;NM_005834;NM_001167990;NM_001167947;NM_001032383;NM_001032381;NM_144495;NM_001032382	chrX:48754500-48755329	X:48754293-48755711	Promoter_Associated	NM_001032382	PQBP1	10084	SG0000010210	0.785714	0.0279266
cg13628057	8159706	EHMT1	9	EHMT1;EHMT1	NM_024757;NM_001145527				NM_024757	EHMT1	79813	SG0000018109	0.880952	0.00724206
cg13628057	8159726	EHMT1	9	EHMT1;EHMT1	NM_024757;NM_001145527				NM_001145527	EHMT1	79813	SG0000018109	0.880952	0.00724206
cg14937059	8141041	SGCE	7	SGCE;SGCE;SGCE	NM_001099400;NM_001099401;NM_003919				NM_003919	SGCE	8910	SG0000012799	0.761905	0.036756
cg14937059	8141042	SGCE	7	SGCE;SGCE;SGCE	NM_001099400;NM_001099401;NM_003919				NM_003919	SGCE	8910	SG0000012799	0.785714	0.0279266
cg14937059	8141044	SGCE	7	SGCE;SGCE;SGCE	NM_001099400;NM_001099401;NM_003919				NM_003919	SGCE	8910	SG0000012799	0.809524	0.0217758
cg14937059	8141049	SGCE	7	SGCE;SGCE;SGCE	NM_001099400;NM_001099401;NM_003919				NM_003919	SGCE	8910	SG0000012799	0.785714	0.0279266
cg15590780	7924301	USH2A	1	USH2A;USH2A;USH2A;USH2A	NM_007123;NM_206933;NM_206933;NM_007123				NM_206933	USH2A	7399	SG0000004278	0.880952	0.00724206
cg15621458	7957731	NEDD1	12	NEDD1;NEDD1;NEDD1;NEDD1	NM_152905;NM_001135175;NM_001135176;NM_001135177	chr12:97300802-97301287			NM_001135177	NEDD1	121441	SG0000013935	0.761905	0.036756
cg17665601	8152869	ASAP1	8	ASAP1	NM_018482				NM_018482	ASAP1	50807	SG0000015331	0.904762	0.00456349
cg17951408	8142653	IQUB	7	IQUB	NM_178827				NM_178827	IQUB	154865	SG0000016467	0.880952	0.00724206
cg18369913	7948045	OR4C46	11	OR4C46	NM_001004703				NM_001004703	OR4C46	119749	SG0000018592	0.738095	0.0458333
cg18758559	7967653	TMEM132D	12	TMEM132D	NM_133448				NM_133448	TMEM132D	121256	SG0000015195	0.833333	0.015377
cg18868146	7924316	ESRRG	1	ESRRG;ESRRG;ESRRG	NM_206594;NM_206595;NM_001134285				NM_206594	ESRRG	2104	SG0000019648	0.761905	0.036756
cg19449969	7954947	PPHLN1	12	PPHLN1;PPHLN1;PPHLN1;PPHLN1;PPHLN1;PPHLN1;PPHLN1	NM_001143787;NM_201440;NM_001143788;NM_016488;NM_201439;NM_201515;NM_001143789		12:42816577-42816850	Unclassified_Cell_type_specific	NM_001143787	PPHLN1	51535	SG0000013428	0.785714	0.0279266
cg19449969	7954954	PPHLN1	12	PPHLN1;PPHLN1;PPHLN1;PPHLN1;PPHLN1;PPHLN1;PPHLN1	NM_001143787;NM_201440;NM_001143788;NM_016488;NM_201439;NM_201515;NM_001143789		12:42816577-42816850	Unclassified_Cell_type_specific	NM_001143789	PPHLN1	51535	SG0000013428	0.833333	0.015377
cg19778582	8104431	MTRR	5	MTRR;MTRR	NM_024010;NM_002454				NM_024010	MTRR	4552	SG0000012427	0.761905	0.036756
cg19778582	8104437	MTRR	5	MTRR;MTRR	NM_024010;NM_002454				NM_002454	MTRR	4552	SG0000012427	0.738095	0.0458333
cg20795500	8056817	OLA1	2	OLA1;OLA1	NM_013341;NM_001011708				NM_001011708	OLA1	29789	SG0000013843	0.880952	0.00724206
cg21005240	7961785	KIAA0528	12	KIAA0528	NM_014802				NM_014802	KIAA0528	9847	SG0000011173	0.761905	0.036756
cg21005240	7961787	KIAA0528	12	KIAA0528	NM_014802				NM_014802	KIAA0528	9847	SG0000011173	0.833333	0.015377
cg21005240	7961793	KIAA0528	12	KIAA0528	NM_014802				NM_014802	KIAA0528	9847	SG0000011173	0.738095	0.0458333
cg21610090	8051704	CDKL4	2	CDKL4	NM_001009565		2:39454824-39456282	Unclassified	NM_001009565	CDKL4	344387	SG0000020511	0.809524	0.0217758
cg23197236	7947225	LIN7C	11	LIN7C	NM_018362				NM_018362	LIN7C	55327	SG0000014894	0.761905	0.036756
cg27551697	7917620	HFM1	1	HFM1	NM_001017975				NM_001017975	HFM1	164045	SG0000016266	0.857143	0.0107143
cg27551697	7917628	HFM1	1	HFM1	NM_001017975				NM_001017975	HFM1	164045	SG0000016266	0.738095	0.0458333

## Sheet: P4_Pos rho_Loss
Supp Table 13h. Loci with strong POSITIVE association (by rho) in changes in DNA methylation (in LOSS of methylation) with changes in gene expression in stage IV (Endo IV) in P4 vs vehicle.
HM450K.ID	Affy_ID	Symbol	CHR	UCSC_RefGene_Name	UCSC_RefGene_Accession	UCSC_CpG_Islands_Name	Regulatory_Feature_Name	Regulatory_Feature_Group	Affy_Refseq	Affy_Symbol.1	Affy_Entrez	Affy_Ensembl	Rho	P val
cg05109065	8168400	CHIC1	X	LOC139201;CHIC1	NR_029423;NM_001039840	chrX:72782945-72783165	X:72782592-72783937	Promoter_Associated	NM_001039840	CHIC1	53344	SG0000020411	0.738095	0.0458333
cg06422471	8074136	SHANK3	22	SHANK3	NM_001080420	chr22:51169027-51170019			NM_001080420	SHANK3	85358	SG0000025132	0.809524	0.0217758
cg06569826	8002841	LDHD	16	LDHD;LDHD	NM_194436;NM_153486	chr16:75148398-75148864			NM_153486	LDHD	197257	SG0000016681	0.761905	0.036756
cg10069155	7982942	TYRO3	15	TYRO3	NM_006293	chr15:41851723-41851970			NM_006293	TYRO3	7301	SG0000009244	0.761905	0.036756
cg10069155	7982953	TYRO3	15	TYRO3	NM_006293	chr15:41851723-41851970			NM_006293	TYRO3	7301	SG0000009244	0.761905	0.036756
cg10069155	7982954	TYRO3	15	TYRO3	NM_006293	chr15:41851723-41851970			NM_006293	TYRO3	7301	SG0000009244	0.809524	0.0217758
cg12240358	7991046	HOMER2	15	HOMER2;HOMER2;HOMER2;HOMER2	NM_199330;NM_004839;NM_199332;NM_199331	chr15:83620950-83621727	15:83619518-83619889	Unclassified_Cell_type_specific	NM_199331	HOMER2	9455	SG0000010394	0.785714	0.0279266
cg13807886	7931766	ADARB2	10	ADARB2	NM_018702	chr10:1439621-1440014			NM_018702	ADARB2	105	SG0000018573	0.738095	0.0458333
cg13807886	7931774	ADARB2	10	ADARB2	NM_018702	chr10:1439621-1440014			NM_018702	ADARB2	105	SG0000018573	0.738095	0.0458333
cg14531436	8153179	TRAPPC9	8	TRAPPC9;TRAPPC9	NM_001160372;NM_031466				NM_031466	TRAPPC9	83696	SG0000016763	0.880952	0.00724206
cg14852456	8018375	GRB2	17	GRB2;GRB2	NM_002086;NM_203506				NM_203506	GRB2	2885	SG0000017788	0.880952	0.00724206
cg16453474	8105103	C7	5	C7	NM_000587				NM_000587	C7	730	SG0000011293	0.880952	0.00724206
cg16613938	8024322	APC2	19	APC2	NM_005883	chr19:1472935-1473210			NM_005883	APC2	10297	SG0000011526	0.928571	0.00223214
cg16911576	7937754	TNNT3	11	TNNT3;TNNT3;TNNT3;TNNT3	NM_001042781;NM_006757;NM_001042780;NM_001042782	chr11:1958934-1959247			NM_001042781	TNNT3	7140	SG0000013059	0.809524	0.0217758
cg18243542	8131988	TAX1BP1	7	TAX1BP1;TAX1BP1	NM_006024;NM_001079864				NM_001079864	TAX1BP1	8887	SG0000010605	0.761905	0.036756
cg21036936	7984785	PML	15	PML;PML;PML;PML;PML;PML;PML;PML;PML	NM_033247;NM_033244;NM_002675;NM_033238;NM_033246;NM_033250;NM_033239;NM_033249;NM_033240	chr15:74315178-74315711			NM_033240	PML	5371	SG0000014046	0.833333	0.015377
cg21126229	8098860	RNF212	4	RNF212;RNF212	NM_001131034;NM_194439	chr4:1107125-1107728			NM_001131034	RNF212	285498	SG0000017822	0.738095	0.0458333
cg21210232	7897270	RNF207	1	RNF207	NM_207396	chr1:6268820-6269588	1:6267663-6270376	Promoter_Associated	NM_207396	RNF207	388591	SG0000015828	0.809524	0.0217758
cg21210232	7897276	RNF207	1	RNF207	NM_207396	chr1:6268820-6269588	1:6267663-6270376	Promoter_Associated	NM_207396	RNF207	388591	SG0000015828	0.738095	0.0458333
cg21342785	8150447	ANK1	8	ANK1	NM_001142446				NM_001142446	ANK1	286	SG0000002953	0.833333	0.015377
cg22385669	7987336	AQR	15	AQR	NM_014691	chr15:35261686-35262124			NM_014691	AQR	9716	SG0000002177	0.880952	0.00724206
cg25105522	8016211	MAP3K14	17	MAP3K14	NM_003954		17:43353830-43355578	Unclassified	NM_003954	MAP3K14	9020	SG0000000606	0.738095	0.0458333

## Sheet: E2+P4_neg rho_Gain
Supp Table 13i. Loci with strong NEGATIVE association (by rho) in changes in DNA methylation (in Gain of methylation) with changes in gene expression in stage IV (Endo IV) in E2+P4 vs vehicle.
HM450K.ID	Affy_ID	Symbol	CHR	UCSC_RefGene_Name	UCSC_RefGene_Accession	UCSC_CpG_Islands_Name	Regulatory_Feature_Name	Regulatory_Feature_Group	Affy_Refseq	Affy_Symbol.1	Affy_Entrez	Affy_Ensembl	Rho	P val
cg00009553	8001788	CDH8	16	CDH8	NM_001796				NM_001796	CDH8	1006	SG0000015039	-0.761905	0.036756
cg00444581	8153252	PTK2	8	PTK2;PTK2	NM_153831;NM_005607				NM_005607	PTK2	5747	SG0000016939	-0.761905	0.036756
cg01591025	8138627	OSBPL3	7	OSBPL3;OSBPL3;OSBPL3;OSBPL3	NM_015550;NM_145322;NM_145320;NM_145321	chr7:25018999-25020255	7:25018388-25019482	Promoter_Associated	NM_145321	OSBPL3	26031	SG0000007088	-0.738095	0.0458333
cg03483900	8151373	C8orf84	8	C8orf84	NM_153225				NM_153225	C8orf84	157869	SG0000016476	-0.761905	0.036756
cg07127957	7934443	SYNPO2L	10	SYNPO2L;SYNPO2L	NM_024875;NM_001114133	chr10:75407413-75407706			NM_001114133	SYNPO2L	79933	SG0000016631	-0.761905	0.036756
cg07713026	8168286	NONO	X	NONO;NONO;BCYRN1;NONO;NONO	NM_001145408;NM_001145410;NR_001568;NM_007363;NM_001145409	chrX:70503261-70503963	X:70502639-70504014	Promoter_Associated	NM_001145409	NONO	4841	SG0000014714	-0.857143	0.0107143
cg07713026	8168289	NONO	X	NONO;NONO;BCYRN1;NONO;NONO	NM_001145408;NM_001145410;NR_001568;NM_007363;NM_001145409	chrX:70503261-70503963	X:70502639-70504014	Promoter_Associated	NM_001145409	NONO	4841	SG0000014714	-0.857143	0.0107143
cg11661265	8099766	ARAP2	4	ARAP2	NM_015230				NM_015230	ARAP2	116984	SG0000004736	-0.785714	0.0279266
cg12629008	7916551	DAB1	1	DAB1	NM_021080				NM_021080	DAB1	1600	SG0000017340	-0.761905	0.036756
cg13817037	8155175	RECK	9	RECK	NM_021111				NM_021111	RECK	8434	SG0000012270	-0.738095	0.0458333
cg13939602	7953045	CACNA1C	12	CACNA1C;CACNA1C;CACNA1C;CACNA1C;CACNA1C;CACNA1C;CACNA1C;CACNA1C;CACNA1C;CACNA1C;CACNA1C;CACNA1C;CACNA1C;CACNA1C;CACNA1C;CACNA1C;CACNA1C;CACNA1C;CACNA1C;CACNA1C;CACNA1C;CACNA1C;CACNA1C	NM_001129844;NM_001129827;NM_001129839;NM_001129834;NM_001129841;NM_000719;NM_001129830;NM_001167625;NM_001129843;NM_001167624;NM_001129835;NM_001129837;NM_001167623;NM_001129840;NM_199460;NM_001129833;NM_001129832;NM_001129829;NM_001129846;NM_001129836;NM_001129838;NM_001129831;NM_001129842				NM_001129844	CACNA1C	775	SG0000015106	-0.928571	0.00223214
cg13939602	7953049	CACNA1C	12	CACNA1C;CACNA1C;CACNA1C;CACNA1C;CACNA1C;CACNA1C;CACNA1C;CACNA1C;CACNA1C;CACNA1C;CACNA1C;CACNA1C;CACNA1C;CACNA1C;CACNA1C;CACNA1C;CACNA1C;CACNA1C;CACNA1C;CACNA1C;CACNA1C;CACNA1C;CACNA1C	NM_001129844;NM_001129827;NM_001129839;NM_001129834;NM_001129841;NM_000719;NM_001129830;NM_001167625;NM_001129843;NM_001167624;NM_001129835;NM_001129837;NM_001167623;NM_001129840;NM_199460;NM_001129833;NM_001129832;NM_001129829;NM_001129846;NM_001129836;NM_001129838;NM_001129831;NM_001129842				NM_001129844	CACNA1C	775	SG0000015106	-0.904762	0.00456349
cg13939602	7953062	CACNA1C	12	CACNA1C;CACNA1C;CACNA1C;CACNA1C;CACNA1C;CACNA1C;CACNA1C;CACNA1C;CACNA1C;CACNA1C;CACNA1C;CACNA1C;CACNA1C;CACNA1C;CACNA1C;CACNA1C;CACNA1C;CACNA1C;CACNA1C;CACNA1C;CACNA1C;CACNA1C;CACNA1C	NM_001129844;NM_001129827;NM_001129839;NM_001129834;NM_001129841;NM_000719;NM_001129830;NM_001167625;NM_001129843;NM_001167624;NM_001129835;NM_001129837;NM_001167623;NM_001129840;NM_199460;NM_001129833;NM_001129832;NM_001129829;NM_001129846;NM_001129836;NM_001129838;NM_001129831;NM_001129842				NM_001129844	CACNA1C	775	SG0000015106	-0.761905	0.036756
cg13939602	7953088	CACNA1C	12	CACNA1C;CACNA1C;CACNA1C;CACNA1C;CACNA1C;CACNA1C;CACNA1C;CACNA1C;CACNA1C;CACNA1C;CACNA1C;CACNA1C;CACNA1C;CACNA1C;CACNA1C;CACNA1C;CACNA1C;CACNA1C;CACNA1C;CACNA1C;CACNA1C;CACNA1C;CACNA1C	NM_001129844;NM_001129827;NM_001129839;NM_001129834;NM_001129841;NM_000719;NM_001129830;NM_001167625;NM_001129843;NM_001167624;NM_001129835;NM_001129837;NM_001167623;NM_001129840;NM_199460;NM_001129833;NM_001129832;NM_001129829;NM_001129846;NM_001129836;NM_001129838;NM_001129831;NM_001129842				NM_001129844	CACNA1C	775	SG0000015106	-0.785714	0.0279266
cg15026456	7967667	RIMBP2	12	RIMBP2	NM_015347				NM_015347	RIMBP2	23504	SG0000006070	-0.964286	0.00277778
cg15459537	8078520	ARPP21	3	ARPP-21	NM_016300				NM_016300	ARPP21	10777	SG0000017299	-0.785714	0.0279266
cg21484182	8174969	DCAF12L2	X	DCAF12L2	NM_001013628	chrX:125299245-125300436			NM_001013628	DCAF12L2	340578	SG0000019835	-0.785714	0.0279266
cg22191665	8113861	FBN2	5	FBN2	NM_001999				NM_001999	FBN2	2201	SG0000013882	-0.857143	0.0107143
cg22688969	7944663	SC5DL	11	SC5DL;SC5DL	NM_001024956;NM_006918				NM_001024956	SC5DL	6309	SG0000010992	-0.738095	0.0458333
cg22688969	7944666	SC5DL	11	SC5DL;SC5DL	NM_001024956;NM_006918				NM_006918	SC5DL	6309	SG0000010992	-0.738095	0.0458333
cg23590262	8098308	GALNTL6	4	GALNTL6	NM_001034845				NM_001034845	GALNTL6	442117	SG0000017447	-0.738095	0.0458333
cg25035332	7933675	PCDH15	10	PCDH15;PCDH15;PCDH15;PCDH15;PCDH15;PCDH15;PCDH15;PCDH15;PCDH15;PCDH15;PCDH15;PCDH15	NM_001142768;NM_001142764;NM_001142771;NM_033056;NM_001142763;NM_001142773;NM_001142765;NM_001142772;NM_001142769;NM_001142766;NM_001142770;NM_001142767				NM_001142768	PCDH15	65217	SG0000015027	-0.97619	0.000396825
cg25160605	7938947	NELL1	11	NELL1;NELL1	NM_006157;NM_201551				NM_201551	NELL1	4745	SG0000016597	-0.738095	0.0458333
cg27627854	7943679	ATM	11	ATM;ATM	NM_000051;NM_138292				NM_000051	ATM	472	SG0000014931	-0.738095	0.0458333
cg27627854	7943687	ATM	11	ATM;ATM	NM_000051;NM_138292				NM_000051	ATM	472	SG0000014931	-0.857143	0.0107143

## Sheet: E2+P4_neg rho_Loss
Supp Table 13j. Loci with strong NEGATIVE association (by rho) in changes in DNA methylation (in LOSS of methylation) with changes in gene expression in stage IV (Endo IV) in E2+P4 vs vehicle.
HM450K.ID	Affy_ID	Symbol	CHR	UCSC_RefGene_Name	UCSC_RefGene_Accession	UCSC_CpG_Islands_Name	Regulatory_Feature_Name	Regulatory_Feature_Group	Affy_Refseq	Affy_Symbol.1	Affy_Entrez	Affy_Ensembl	Rho	P val
cg00052684	8125920	FKBP5	6	FKBP5	NM_001145775	chr6:35695725-35696156	6:35694147-35694393	Unclassified_Cell_type_specific	NM_001145775	FKBP5	2289	SG0000009606	-0.904762	0.00456349
cg00052684	8125921	FKBP5	6	FKBP5	NM_001145775	chr6:35695725-35696156	6:35694147-35694393	Unclassified_Cell_type_specific	NM_001145775	FKBP5	2289	SG0000009606	-0.857143	0.0107143
cg00052684	8125922	FKBP5	6	FKBP5	NM_001145775	chr6:35695725-35696156	6:35694147-35694393	Unclassified_Cell_type_specific	NM_001145775	FKBP5	2289	SG0000009606	-0.928571	0.00223214
cg00052684	8125923	FKBP5	6	FKBP5	NM_001145775	chr6:35695725-35696156	6:35694147-35694393	Unclassified_Cell_type_specific	NM_001145775	FKBP5	2289	SG0000009606	-0.833333	0.015377
cg00052684	8125924	FKBP5	6	FKBP5	NM_001145775	chr6:35695725-35696156	6:35694147-35694393	Unclassified_Cell_type_specific	NM_001145775	FKBP5	2289	SG0000009606	-0.809524	0.0217758
cg00052684	8125925	FKBP5	6	FKBP5	NM_001145775	chr6:35695725-35696156	6:35694147-35694393	Unclassified_Cell_type_specific	NM_001145775	FKBP5	2289	SG0000009606	-0.857143	0.0107143
cg00052684	8125926	FKBP5	6	FKBP5	NM_001145775	chr6:35695725-35696156	6:35694147-35694393	Unclassified_Cell_type_specific	NM_001145775	FKBP5	2289	SG0000009606	-0.904762	0.00456349
cg00052684	8125927	FKBP5	6	FKBP5	NM_001145775	chr6:35695725-35696156	6:35694147-35694393	Unclassified_Cell_type_specific	NM_001145775	FKBP5	2289	SG0000009606	-0.880952	0.00724206
cg00052684	8125928	FKBP5	6	FKBP5	NM_001145775	chr6:35695725-35696156	6:35694147-35694393	Unclassified_Cell_type_specific	NM_001145775	FKBP5	2289	SG0000009606	-0.904762	0.00456349
cg00052684	8125929	FKBP5	6	FKBP5	NM_001145775	chr6:35695725-35696156	6:35694147-35694393	Unclassified_Cell_type_specific	NM_001145775	FKBP5	2289	SG0000009606	-0.880952	0.00724206
cg00052684	8125930	FKBP5	6	FKBP5	NM_001145775	chr6:35695725-35696156	6:35694147-35694393	Unclassified_Cell_type_specific	NM_001145775	FKBP5	2289	SG0000009606	-0.904762	0.00456349
cg00052684	8125931	FKBP5	6	FKBP5	NM_001145775	chr6:35695725-35696156	6:35694147-35694393	Unclassified_Cell_type_specific	NM_001145775	FKBP5	2289	SG0000009606	-0.857143	0.0107143
cg00052684	8125932	FKBP5	6	FKBP5	NM_001145775	chr6:35695725-35696156	6:35694147-35694393	Unclassified_Cell_type_specific	NM_001145775	FKBP5	2289	SG0000009606	-0.904762	0.00456349
cg00701918	8010533	RPTOR	17	RPTOR;RPTOR	NM_001163034;NM_020761				NM_001163034	RPTOR	57521	SG0000014156	-0.904762	0.00456349
cg00701918	8010548	RPTOR	17	RPTOR;RPTOR	NM_001163034;NM_020761				NM_020761	RPTOR	57521	SG0000014156	-0.738095	0.0458333
cg00872532	8046909	GULP1	2	GULP1	NM_016315				NM_016315	GULP1	51454	SG0000014436	-0.857143	0.0107143
cg00872532	8046910	GULP1	2	GULP1	NM_016315				NM_016315	GULP1	51454	SG0000014436	-0.761905	0.036756
cg00872532	8046911	GULP1	2	GULP1	NM_016315				NM_016315	GULP1	51454	SG0000014436	-0.761905	0.036756
cg00872532	8046912	GULP1	2	GULP1	NM_016315				NM_016315	GULP1	51454	SG0000014436	-0.761905	0.036756
cg00872532	8046920	GULP1	2	GULP1	NM_016315				NM_016315	GULP1	51454	SG0000014436	-0.904762	0.00456349
cg00872532	8046921	GULP1	2	GULP1	NM_016315				NM_016315	GULP1	51454	SG0000014436	-0.880952	0.00724206
cg01921059	8135602	MET	7	MET;MET	NM_000245;NM_001127500				NM_000245	MET	4233	SG0000010597	-0.738095	0.0458333
cg01921059	8135606	MET	7	MET;MET	NM_000245;NM_001127500				NM_001127500	MET	4233	SG0000010597	-0.738095	0.0458333
cg01921059	8135617	MET	7	MET;MET	NM_000245;NM_001127500				NM_001127500	MET	4233	SG0000010597	-0.809524	0.0217758
cg02119955	7969875	ITGBL1	13	ITGBL1	NM_004791	chr13:102106165-102106488			NM_004791	ITGBL1	9358	SG0000019854	-0.738095	0.0458333
cg02119955	7969876	ITGBL1	13	ITGBL1	NM_004791	chr13:102106165-102106488			NM_004791	ITGBL1	9358	SG0000019854	-0.761905	0.036756
cg03275076	8083404	MED12L	3	MED12L;P2RY14	NM_053002;NM_014879				NM_053002	MED12L	116931	SG0000014489	-0.880952	0.00724206
cg03301579	8032690	MATK	19	MATK;MATK;MATK	NM_002378;NM_139355;NM_139354	chr19:3785511-3786653	19:3783533-3783935	Unclassified_Cell_type_specific	NM_002378	MATK	4145	SG0000000726	-0.904762	0.00456349
cg03894103	8051947	PREPL	2	PREPL;PREPL;PREPL;PREPL;PREPL;PREPL;PREPL;PREPL	NM_001171613;NM_006036;NM_006036;NM_001171617;NM_001042385;NM_001042386;NM_001171603;NM_001171606	chr2:44588954-44589358			NM_001171606	PREPL	9581	SG0000013807	-0.738095	0.0458333
cg05258294	7998688	ZNF598	16	ZNF598	NM_178167	chr16:2048194-2048754			NM_178167	ZNF598	90850	SG0000016796	-0.738095	0.0458333
cg05796128	8094595	TBC1D1	4	TBC1D1	NM_015173				NM_015173	TBC1D1	23216	SG0000006588	-0.738095	0.0458333
cg06172859	8121690	DCBLD1	6	DCBLD1	NM_173674	chr6:117869097-117869530			NM_173674	DCBLD1	285761	SG0000016446	-0.785714	0.0279266
cg06172859	8121691	DCBLD1	6	DCBLD1	NM_173674	chr6:117869097-117869530			NM_173674	DCBLD1	285761	SG0000016446	-0.738095	0.0458333
cg06172859	8121692	DCBLD1	6	DCBLD1	NM_173674	chr6:117869097-117869530			NM_173674	DCBLD1	285761	SG0000016446	-0.809524	0.0217758
cg06172859	8121693	DCBLD1	6	DCBLD1	NM_173674	chr6:117869097-117869530			NM_173674	DCBLD1	285761	SG0000016446	-0.809524	0.0217758
cg06172859	8121694	DCBLD1	6	DCBLD1	NM_173674	chr6:117869097-117869530			NM_173674	DCBLD1	285761	SG0000016446	-0.785714	0.0279266
cg06172859	8121695	DCBLD1	6	DCBLD1	NM_173674	chr6:117869097-117869530			NM_173674	DCBLD1	285761	SG0000016446	-0.833333	0.015377
cg06172859	8121697	DCBLD1	6	DCBLD1	NM_173674	chr6:117869097-117869530			NM_173674	DCBLD1	285761	SG0000016446	-0.857143	0.0107143
cg06172859	8121699	DCBLD1	6	DCBLD1	NM_173674	chr6:117869097-117869530			NM_173674	DCBLD1	285761	SG0000016446	-0.738095	0.0458333
cg06172859	8121700	DCBLD1	6	DCBLD1	NM_173674	chr6:117869097-117869530			NM_173674	DCBLD1	285761	SG0000016446	-0.761905	0.036756
cg06460475	7938209	RBMXL2	11	RBMXL2	NM_014469	chr11:7110132-7111376			NM_014469	RBMXL2	27288	SG0000017074	-0.97619	0.000396825
cg06491405	8118335	C2	6	C2;C2	NM_000063;NM_001145903				NM_000063	C2	717	ENSG00000166278, ENSG00000204364, ENSG00000206372, ENSG00000226560, ENSG00000231543, ENSG00000235017, ENSG00000235696	-0.761905	0.036756
cg06491405	8178105	C2	6	C2;C2	NM_000063;NM_001145903				NM_001145903	C2	717	ENSG00000166278, ENSG00000204364, ENSG00000206372, ENSG00000226560, ENSG00000231543, ENSG00000235017, ENSG00000235696	-0.761905	0.036756
cg06491405	8179341	C2	6	C2;C2	NM_000063;NM_001145903				NM_001145903	C2	717	ENSG00000166278, ENSG00000204364, ENSG00000206372, ENSG00000226560, ENSG00000231543, ENSG00000235017, ENSG00000235696	-0.761905	0.036756
cg06676119	8057487	PDE1A	2	PDE1A;PDE1A	NM_005019;NM_001003683				NM_001003683	PDE1A	5136	SG0000011525	-0.857143	0.0238095
cg06676119	8057493	PDE1A	2	PDE1A;PDE1A	NM_005019;NM_001003683				NM_001003683	PDE1A	5136	SG0000011525	-0.785714	0.0480159
cg06871344	8010935	VPS53	17	VPS53;VPS53	NM_018289;NM_001128159				NM_001128159	VPS53	55275	SG0000014125	-0.928571	0.00223214
cg07160602	7986381	IGF1R	15	IGF1R	NM_000875	chr15:99190446-99194559			NM_000875	IGF1R	3480	SG0000014044	-0.904762	0.00456349
cg08135718	8135117	CUX1	7	CUX1;CUX1;CUX1	NM_181500;NM_181552;NM_001913				NM_001913	CUX1	1523	SG0000016096	-0.809524	0.0217758
cg08135718	8135118	CUX1	7	CUX1;CUX1;CUX1	NM_181500;NM_181552;NM_001913				NM_001913	CUX1	1523	SG0000016096	-0.809524	0.0217758
cg08135718	8135119	CUX1	7	CUX1;CUX1;CUX1	NM_181500;NM_181552;NM_001913				NM_001913	CUX1	1523	SG0000016096	-0.761905	0.036756
cg08135718	8135121	CUX1	7	CUX1;CUX1;CUX1	NM_181500;NM_181552;NM_001913				NM_001913	CUX1	1523	SG0000016096	-0.833333	0.015377
cg08135718	8135122	CUX1	7	CUX1;CUX1;CUX1	NM_181500;NM_181552;NM_001913				NM_001913	CUX1	1523	SG0000016096	-0.880952	0.00724206
cg08135718	8135123	CUX1	7	CUX1;CUX1;CUX1	NM_181500;NM_181552;NM_001913				NM_001913	CUX1	1523	SG0000016096	-0.809524	0.0217758
cg08135718	8135124	CUX1	7	CUX1;CUX1;CUX1	NM_181500;NM_181552;NM_001913				NM_001913	CUX1	1523	SG0000016096	-0.904762	0.00456349
cg08815352	8009194	MAP3K3	17	MAP3K3;MAP3K3	NM_002401;NM_203351	chr17:61699007-61700728			NM_203351	MAP3K3	4215	SG0000019890	-0.761905	0.036756
cg08983429	7992929	CLUAP1	16	CLUAP1;CLUAP1	NM_015041;NM_024793		16:3576886-3578259	Unclassified	NM_024793	CLUAP1	23059	SG0000010335	-0.761905	0.036756
cg09571713	8103545	SPOCK3	4	SPOCK3;SPOCK3	NM_001040159;NM_016950	chr4:168155005-168155765			NM_016950	SPOCK3	50859	SG0000019610	-0.738095	0.0458333
cg09758937	8054257	AFF3	2	AFF3;AFF3	NM_001025108;NM_002285				NM_002285	AFF3	3899	SG0000014421	-0.928571	0.00223214
cg10266681	8044980	CNTNAP5	2	CNTNAP5	NM_130773				NM_130773	CNTNAP5	129684	SG0000015505	-0.904762	0.00456349
cg10266681	8044986	CNTNAP5	2	CNTNAP5	NM_130773				NM_130773	CNTNAP5	129684	SG0000015505	-0.761905	0.036756
cg11197913	7919186	PDE4DIP	1	PDE4DIP	NM_022359				NM_022359	PDE4DIP	9659	SG0000017810	-0.809524	0.0217758
cg11763800	7977426	C14orf80	14	C14orf80	NM_001134877	chr14:105956175-105958197	14:105955465-105956544	Promoter_Associated	NM_001134877	C14orf80	283643	SG0000018534	-0.857143	0.0107143
cg13992444	8122661	UST	6	UST	NM_005715				NM_005715	UST	10090	SG0000011196	-0.833333	0.015377
cg13992444	8122662	UST	6	UST	NM_005715				NM_005715	UST	10090	SG0000011196	-0.857143	0.0107143
cg13992444	8122664	UST	6	UST	NM_005715				NM_005715	UST	10090	SG0000011196	-0.857143	0.0107143
cg13992444	8122665	UST	6	UST	NM_005715				NM_005715	UST	10090	SG0000011196	-0.761905	0.036756
cg13992444	8122669	UST	6	UST	NM_005715				NM_005715	UST	10090	SG0000011196	-0.857143	0.0107143
cg14016236	8083904	FNDC3B	3	FNDC3B;FNDC3B	NM_022763;NM_001135095				NM_022763	FNDC3B	64778	SG0000007542	-0.809524	0.0217758
cg14016236	8083911	FNDC3B	3	FNDC3B;FNDC3B	NM_022763;NM_001135095				NM_001135095	FNDC3B	64778	SG0000007542	-0.738095	0.0458333
cg14016236	8083912	FNDC3B	3	FNDC3B;FNDC3B	NM_022763;NM_001135095				NM_001135095	FNDC3B	64778	SG0000007542	-0.857143	0.0107143
cg14016236	8083915	FNDC3B	3	FNDC3B;FNDC3B	NM_022763;NM_001135095				NM_001135095	FNDC3B	64778	SG0000007542	-0.928571	0.00223214
cg14016236	8083916	FNDC3B	3	FNDC3B;FNDC3B	NM_022763;NM_001135095				NM_001135095	FNDC3B	64778	SG0000007542	-0.809524	0.0217758
cg14016236	8083917	FNDC3B	3	FNDC3B;FNDC3B	NM_022763;NM_001135095				NM_001135095	FNDC3B	64778	SG0000007542	-0.761905	0.036756
cg14016236	8083920	FNDC3B	3	FNDC3B;FNDC3B	NM_022763;NM_001135095				NM_001135095	FNDC3B	64778	SG0000007542	-0.833333	0.015377
cg14016236	8083923	FNDC3B	3	FNDC3B;FNDC3B	NM_022763;NM_001135095				NM_001135095	FNDC3B	64778	SG0000007542	-0.785714	0.0279266
cg14016236	8083925	FNDC3B	3	FNDC3B;FNDC3B	NM_022763;NM_001135095				NM_001135095	FNDC3B	64778	SG0000007542	-0.738095	0.0458333
cg14016236	8083926	FNDC3B	3	FNDC3B;FNDC3B	NM_022763;NM_001135095				NM_001135095	FNDC3B	64778	SG0000007542	-0.833333	0.015377
cg14016236	8083927	FNDC3B	3	FNDC3B;FNDC3B	NM_022763;NM_001135095				NM_001135095	FNDC3B	64778	SG0000007542	-0.809524	0.0217758
cg14657876	7938867	NAV2	11	NAV2;NAV2;NAV2	NM_182964;NM_001111018;NM_145117				NM_145117	NAV2	89797	SG0000016683	-0.738095	0.0458333
cg16056900	8078821	EXOG	3	EXOG;EXOG	NM_001145464;NM_005107	chr3:38537682-38538071	3:38536970-38538612	Promoter_Associated	NM_005107	EXOG	9941	SG0000015703	-0.880952	0.00724206
cg18864926	7981267	CCDC85C	14	CCDC85C	NM_001144995				NM_001144995	CCDC85C	317762	SG0000020547	-0.857143	0.0107143
cg20020143	8171705	SH3KBP1	X	SH3KBP1;SH3KBP1	NM_031892;NM_031892	chrX:19905027-19906557	X:19905494-19905998	Promoter_Associated	NM_031892	SH3KBP1	30011	SG0000014701	-0.785714	0.0279266
cg20396559	8088611	MAGI1	3	MAGI1;MAGI1;MAGI1	NM_015520;NM_001033057;NM_004742				NM_004742	MAGI1	9223	SG0000015127	-0.857143	0.0107143
cg20651644	7988652	ATP8B4	15	ATP8B4	NM_024837				NM_024837	ATP8B4	79895	SG0000010404	-0.738095	0.0458333
cg21292587	8135549	FOXP2	7	FOXP2;FOXP2;FOXP2	NM_014491;NM_148898;NM_148899				NM_014491	FOXP2	93986	SG0000012857	-0.785714	0.0279266
cg21292587	8135552	FOXP2	7	FOXP2;FOXP2;FOXP2	NM_014491;NM_148898;NM_148899				NM_148899	FOXP2	93986	SG0000012857	-0.809524	0.0217758
cg21292587	8135556	FOXP2	7	FOXP2;FOXP2;FOXP2	NM_014491;NM_148898;NM_148899				NM_014491	FOXP2	93986	SG0000012857	-0.738095	0.0458333
cg21292587	8135558	FOXP2	7	FOXP2;FOXP2;FOXP2	NM_014491;NM_148898;NM_148899				NM_014491	FOXP2	93986	SG0000012857	-0.833333	0.015377
cg21292587	8135559	FOXP2	7	FOXP2;FOXP2;FOXP2	NM_014491;NM_148898;NM_148899				NM_148899	FOXP2	93986	SG0000012857	-0.761905	0.036756
cg21292587	8135565	FOXP2	7	FOXP2;FOXP2;FOXP2	NM_014491;NM_148898;NM_148899				NM_014491	FOXP2	93986	SG0000012857	-0.785714	0.0279266
cg22994198	8032250	ADAMTSL5	19	ADAMTSL5	NM_213604	chr19:1510493-1510725	19:1507177-1508776	Promoter_Associated	NM_213604	ADAMTSL5	339366	SG0000018576	-0.857143	0.0107143
cg24837219	8082773	TMEM108	3	TMEM108;TMEM108	NM_001136469;NM_023943				NM_023943	TMEM108	66000	SG0000014486	-0.833333	0.015377
cg26352161	8119690	PTK7	6	PTK7;PTK7;PTK7;PTK7	NM_002821;NM_152881;NM_152882;NM_152880				NM_152880	PTK7	5754	SG0000011265	-0.761905	0.036756
cg26352161	8119701	PTK7	6	PTK7;PTK7;PTK7;PTK7	NM_002821;NM_152881;NM_152882;NM_152880				NM_152880	PTK7	5754	SG0000011265	-0.738095	0.0458333
cg27117720	7993689	C16orf62	16	C16orf62	NM_020314				NM_020314	C16orf62	57020	SG0000010354	-0.833333	0.015377
cg27117720	7993691	C16orf62	16	C16orf62	NM_020314				NM_020314	C16orf62	57020	SG0000010354	-0.833333	0.015377
cg27484662	8021858	ATP9B	18	ATP9B	NM_198531	chr18:77125676-77125885			NM_198531	ATP9B	374868	SG0000016637	-0.857143	0.0107143
cg27484662	8021860	ATP9B	18	ATP9B	NM_198531	chr18:77125676-77125885			NM_198531	ATP9B	374868	SG0000016637	-0.761905	0.036756

[truncated: 2 more sheets: E2+P4_Pos rho_Gain, E2+P4_Pos rho_Loss]
